# Supplementary material for: Rational Design of Aptamer-Tagged tRNAs
Source: Int J Mol Sci. 2020 Oct 21;21(20):7793. doi: 10.3390/ijms21207793 (PMC7590224; doi:10.3390/ijms21207793)
Supplement: Supplementary file 1 [file ijms-21-07793-s001.zip › MukaiIJMS_List.xlsx]

## Sheet: tRNA
	tRNA ID	altenative name	sequence
	S001	0000S-CTA (allo-tRNAUTu2)	GGACGGGGGTTCCGTCTGGTGACGGTCGCGGGCTCTAAACCCGTCAGGACGCTGTGCAGGCGTTAGGTTCGATTCCTCCCCCGTCCGCCA
	A001	0000A-CTA	GGGCGGGGGTTCCGTCTGGTGACGGTCGCGGGCTCTAAACCCGTCAGGACGCTGTGCAGGCGTTAGGTTCGATTCCTCCCCCGTCCACCA
	S002	0000S-b3T-CTA	GGACGGGGGTTCCGTCTGGTGACGGTCGCGGGCTCTAAACCCGTCAGGACGCTGTGCAGGCtGTTAGGTTCGATTCCTCCCCCGTCCGCCA
	A002	0000A-b3T-CTA	GGGCGGGGGTTCCGTCTGGTGACGGTCGCGGGCTCTAAACCCGTCAGGACGCTGTGCAGGCtGTTAGGTTCGATTCCTCCCCCGTCCACCA
	S003	0000S-b3A-CTA	GGACGGGGGTTCCGTCTGGTGACGGTCGCGGGCTCTAAACCCGTCAGGACGCTGTGCAGGCaGTTAGGTTCGATTCCTCCCCCGTCCGCCA
	A003	0000A-b3A-CTA	GGGCGGGGGTTCCGTCTGGTGACGGTCGCGGGCTCTAAACCCGTCAGGACGCTGTGCAGGCaGTTAGGTTCGATTCCTCCCCCGTCCACCA
	S004	0000S-b2C-CTA	GGACGGGGGTTCCGTCTGGTGACGGTCGCGGGCTCTAAACCCGTCAGGACGCTGTGCAGGCGcTTAGGTTCGATTCCTCCCCCGTCCGCCA
	A004	0000A-b2C-CTA	GGGCGGGGGTTCCGTCTGGTGACGGTCGCGGGCTCTAAACCCGTCAGGACGCTGTGCAGGCGcTTAGGTTCGATTCCTCCCCCGTCCACCA
	S005	0000S-b2A-CTA	GGACGGGGGTTCCGTCTGGTGACGGTCGCGGGCTCTAAACCCGTCAGGACGCTGTGCAGGCGaTTAGGTTCGATTCCTCCCCCGTCCGCCA
	A005	0000A-b2A-CTA	GGGCGGGGGTTCCGTCTGGTGACGGTCGCGGGCTCTAAACCCGTCAGGACGCTGTGCAGGCGaTTAGGTTCGATTCCTCCCCCGTCCACCA
	S006	0000S-GCb3T-CTA	GGACGGGGGTTCCGTCTGGTGACGGTCGCGGGCTCTAAACCCGTCAGGGCCGCGTGCAGCGtGCTAGGTTCGATTCCTCCCCCGTCCGCCA
	A006	0000A-GCb3T-CTA	GGGCGGGGGTTCCGTCTGGTGACGGTCGCGGGCTCTAAACCCGTCAGGGCCGCGTGCAGCGtGCTAGGTTCGATTCCTCCCCCGTCCACCA
	S007	0000S-GCb3A-CTA	GGACGGGGGTTCCGTCTGGTGACGGTCGCGGGCTCTAAACCCGTCAGGGCCGCGTGCAGCGaGCTAGGTTCGATTCCTCCCCCGTCCGCCA
	A007	0000A-GCb3A-CTA	GGGCGGGGGTTCCGTCTGGTGACGGTCGCGGGCTCTAAACCCGTCAGGGCCGCGTGCAGCGaGCTAGGTTCGATTCCTCCCCCGTCCACCA
	S008	0000S-GCb2T-CTA	GGACGGGGGTTCCGTCTGGTGACGGTCGCGGGCTCTAAACCCGTCAGGGCCGCGTGCAGCGGtCTAGGTTCGATTCCTCCCCCGTCCGCCA
	A008	0000A-GCb2T-CTA	GGGCGGGGGTTCCGTCTGGTGACGGTCGCGGGCTCTAAACCCGTCAGGGCCGCGTGCAGCGGtCTAGGTTCGATTCCTCCCCCGTCCACCA
	S009	0000S-GCb2A-CTA	GGACGGGGGTTCCGTCTGGTGACGGTCGCGGGCTCTAAACCCGTCAGGGCCGCGTGCAGCGGaCTAGGTTCGATTCCTCCCCCGTCCGCCA
	A009	0000A-GCb2A-CTA	GGGCGGGGGTTCCGTCTGGTGACGGTCGCGGGCTCTAAACCCGTCAGGGCCGCGTGCAGCGGaCTAGGTTCGATTCCTCCCCCGTCCACCA
	S010	0000S-GCrb2T-CTA	GGACGGGGGTTCCGTCTGGTGACGGTCGCGGGCTCTAAACCCGTCAGGGtGCGCGTGCAGCGCCTAGGTTCGATTCCTCCCCCGTCCGCCA
	A010	0000A-GCrb2T-CTA	GGGCGGGGGTTCCGTCTGGTGACGGTCGCGGGCTCTAAACCCGTCAGGGtGCGCGTGCAGCCGCTAGGTTCGATTCCTCCCCCGTCCACCA
	S011	0000S-GCrb2A-CTA	GGACGGGGGTTCCGTCTGGTGACGGTCGCGGGCTCTAAACCCGTCAGGGaGCGCGTGCAGCGCCTAGGTTCGATTCCTCCCCCGTCCGCCA
	A011	0000A-GCrb2A-CTA	GGGCGGGGGTTCCGTCTGGTGACGGTCGCGGGCTCTAAACCCGTCAGGGaGCGCGTGCAGCCGCTAGGTTCGATTCCTCCCCCGTCCACCA
	S012	2225S-CTA (allo-tRNAUTu1)	GGAGGGGAACTTCTATCTGGTGATAGACGGGAACTCTAAATTCCTTGAAATGCCTCGCCGCATTGGGTTCGATTCCCTTCCCCTCCGCCA
	A012	2225A-CTA	GGGGGGGAACTTCTATCTGGTGATAGACGGGAACTCTAAATTCCTTGAAATGCCTCGCCGCATTGGGTTCGATTCCCTTCCCCTCCACCA
	S013	2225S-48aC-CTA	GGAGGGGAACTTCTATCTGGTGATAGACGGGAACTCTAAATTCCTTGAAATGCCTCGCCGCATTcGGGTTCGATTCCCTTCCCCTCCGCCA
	A013	2225A-48aC-CTA	GGGGGGGAACTTCTATCTGGTGATAGACGGGAACTCTAAATTCCTTGAAATGCCTCGCCGCATTcGGGTTCGATTCCCTTCCCCTCCACCA
	S014	2225S-GCb3T-CTA	GGAGGGGAACTTCTATCTGGTGATAGACGGGAACTCTAAATTCCTTGAGGCCGCGTGCAGCGtGCCGGGTTCGATTCCCTTCCCCTCCGCCA
	A014	2225A-GCb3T-CTA	GGGGGGGAACTTCTATCTGGTGATAGACGGGAACTCTAAATTCCTTGAGGCCGCGTGCAGCGtGCCGGGTTCGATTCCCTTCCCCTCCACCA
	S015	2225S-GCb3A-CTA	GGAGGGGAACTTCTATCTGGTGATAGACGGGAACTCTAAATTCCTTGAGGCCGCGTGCAGCGaGCCGGGTTCGATTCCCTTCCCCTCCGCCA
	A015	2225A-GCb3A-CTA	GGGGGGGAACTTCTATCTGGTGATAGACGGGAACTCTAAATTCCTTGAGGCCGCGTGCAGCGaGCCGGGTTCGATTCCCTTCCCCTCCACCA
	S016	2225S-GCb2T-CTA	GGAGGGGAACTTCTATCTGGTGATAGACGGGAACTCTAAATTCCTTGAGGCCGCGTGCAGCGGtCCGGGTTCGATTCCCTTCCCCTCCGCCA
	A016	2225A-GCb2T-CTA	GGGGGGGAACTTCTATCTGGTGATAGACGGGAACTCTAAATTCCTTGAGGCCGCGTGCAGCGGtCCGGGTTCGATTCCCTTCCCCTCCACCA
	S017	2225S-GCb2A-CTA	GGAGGGGAACTTCTATCTGGTGATAGACGGGAACTCTAAATTCCTTGAGGCCGCGTGCAGCGGaCCGGGTTCGATTCCCTTCCCCTCCGCCA
	A017	2225A-GCb2A-CTA	GGGGGGGAACTTCTATCTGGTGATAGACGGGAACTCTAAATTCCTTGAGGCCGCGTGCAGCGGaCCGGGTTCGATTCCCTTCCCCTCCACCA
	S018	2225S-GCrb2T-CTA	GGAGGGGAACTTCTATCTGGTGATAGACGGGAACTCTAAATTCCTTGAGGtCCGCGTGCAGCGGCCGGGTTCGATTCCCTTCCCCTCCGCCA
	A018	2225A-GCrb2T-CTA	GGGGGGGAACTTCTATCTGGTGATAGACGGGAACTCTAAATTCCTTGAGGtCCGCGTGCAGCGGCCGGGTTCGATTCCCTTCCCCTCCACCA
	S019	2225S-GCrb2A-CTA	GGAGGGGAACTTCTATCTGGTGATAGACGGGAACTCTAAATTCCTTGAGGaCCGCGTGCAGCGGCCGGGTTCGATTCCCTTCCCCTCCGCCA
	A019	2225A-GCrb2A-CTA	GGGGGGGAACTTCTATCTGGTGATAGACGGGAACTCTAAATTCCTTGAGGaCCGCGTGCAGCGGCCGGGTTCGATTCCCTTCCCCTCCACCA
	S020	3218S-CTA	GGAGAGTAGATTTCATGCGGTTATGAAATGCGTCTCTAAAACGCAGAGGGGGCTACACACCCCCAGGGTTCAACTCCCCTACTCTCCGCCA
	A020	3218A-CTA	GGGGAGTAGATTTCATGCGGTTATGAAATGCGTCTCTAAAACGCAGAGGGGGCTACACACCCCCAGGGTTCAACTCCCCTACTCTCCACCA
	S021	3218S-rb2T-CTA	GGAGAGTAGATTTCATGCGGTTATGAAATGCGTCTCTAAAACGCAGAGtGGGGCTACACACCCCCAGGGTTCAACTCCCCTACTCTCCGCCA
	A021	3218A-rb2T-CTA	GGGGAGTAGATTTCATGCGGTTATGAAATGCGTCTCTAAAACGCAGAGtGGGGCTACACACCCCCAGGGTTCAACTCCCCTACTCTCCACCA
	S022	3218S-b3A-CTA	GGAGAGTAGATTTCATGCGGTTATGAAATGCGTCTCTAAAACGCAGAGGGGGCTACACACCCaCCAGGGTTCAACTCCCCTACTCTCCGCCA
	A022	3218A-b3A-CTA	GGGGAGTAGATTTCATGCGGTTATGAAATGCGTCTCTAAAACGCAGAGGGGGCTACACACCCaCCAGGGTTCAACTCCCCTACTCTCCACCA
	S023	3218S-GCb3T-CTA	GGAGAGTAGATTTCATGCGGTTATGAAATGCGTCTCTAAAACGCAGGGCCGCGTGCAGCGtGCTGGGTTCAACTCCCCTACTCTCCGCCA
	A023	3218A-GCb3T-CTA	GGGGAGTAGATTTCATGCGGTTATGAAATGCGTCTCTAAAACGCAGGGCCGCGTGCAGCGtGCTGGGTTCAACTCCCCTACTCTCCACCA
	S024	3218S-GCb3T-AA-CTA	GGAGAGTAGATTTCATGCGGTTATGAAATGCGTCTCTAAAACGCAGAGCCGCGTGCAGCGtGCAGGGTTCAACTCCCCTACTCTCCGCCA
	A024	3218A-GCb3T-AA-CTA	GGGGAGTAGATTTCATGCGGTTATGAAATGCGTCTCTAAAACGCAGAGCCGCGTGCAGCGtGCAGGGTTCAACTCCCCTACTCTCCACCA
	S025	3218S-GCb2T-CTA	GGAGAGTAGATTTCATGCGGTTATGAAATGCGTCTCTAAAACGCAGGGCCGCGTGCAGCGGtCTGGGTTCAACTCCCCTACTCTCCGCCA
	A025	3218A-GCb2T-CTA	GGGGAGTAGATTTCATGCGGTTATGAAATGCGTCTCTAAAACGCAGGGCCGCGTGCAGCGGtCTGGGTTCAACTCCCCTACTCTCCACCA
	S026	2954S-CTA	GGAGAGGGCAAGAGTGACGGTTCACTCACCCGTCTCTAAAACGGGTAACGTCTATCCGGGCGTTGGGTTCAATTCCCGCCCTCTCCGCCA
	A026	2954A-CTA	GGGGAGGGCAAGAGTGACGGTTCACTCACCCGTCTCTAAAACGGGTAACGTCTATCCGGGCGTTGGGTTCAATTCCCGCCCTCTCCACCA
	S027	2954S-48aA-CTA	GGAGAGGGCAAGAGTGACGGTTCACTCACCCGTCTCTAAAACGGGTAACGTCTATCCGGGCGTTaGGGTTCAATTCCCGCCCTCTCCGCCA
	A027	2954A-48aA-CTA	GGGGAGGGCAAGAGTGACGGTTCACTCACCCGTCTCTAAAACGGGTAACGTCTATCCGGGCGTTaGGGTTCAATTCCCGCCCTCTCCACCA
	S028	2954S-b3T-CTA	GGAGAGGGCAAGAGTGACGGTTCACTCACCCGTCTCTAAAACGGGTAACGTCTATCCGGGCtGTTGGGTTCAATTCCCGCCCTCTCCGCCA
	A028	2954A-b3T-CTA	GGGGAGGGCAAGAGTGACGGTTCACTCACCCGTCTCTAAAACGGGTAACGTCTATCCGGGCtGTTGGGTTCAATTCCCGCCCTCTCCACCA
	S029	2954S-b3A-CTA	GGAGAGGGCAAGAGTGACGGTTCACTCACCCGTCTCTAAAACGGGTAACGTCTATCCGGGCaGTTGGGTTCAATTCCCGCCCTCTCCGCCA
	A029	2954A-b3A-CTA	GGGGAGGGCAAGAGTGACGGTTCACTCACCCGTCTCTAAAACGGGTAACGTCTATCCGGGCaGTTGGGTTCAATTCCCGCCCTCTCCACCA
	S030	2954S-00b3T-CTA	GGAGAGGGCAAGAGTGACGGTTCACTCACCCGTCTCTAAAACGGGTGACGCTGTGCAGGCtGTTGGGTTCAATTCCCGCCCTCTCCGCCA
	A030	2954A-00b3T-CTA	GGGGAGGGCAAGAGTGACGGTTCACTCACCCGTCTCTAAAACGGGTGACGCTGTGCAGGCtGTTGGGTTCAATTCCCGCCCTCTCCACCA
	S031	2954S-GCb3T-CTA	GGAGAGGGCAAGAGTGACGGTTCACTCACCCGTCTCTAAAACGGGTGGCCGCGTGCAGCGtGCTGGGTTCAATTCCCGCCCTCTCCGCCA
	A031	2954A-GCb3T-CTA	GGGGAGGGCAAGAGTGACGGTTCACTCACCCGTCTCTAAAACGGGTGGCCGCGTGCAGCGtGCTGGGTTCAATTCCCGCCCTCTCCACCA
	S032	1141S-CTA	GGAGTGGTGTGCCCGGCTGGTGCCGGGAGCAGTCTCTAAAACTGCCGACGCTGCGAGGCGTAGGGTTCGATTCCCCACCATTCCGCCA
	A032	1141A-CTA	GGGGTGGTGTGCCCGGCTGGTGCCGGGAGCAGTCTCTAAAACTGCCGACGCTGCGAGGCGTAGGGTTCGATTCCCCACCACTCCACCA
	S033	1141S-b3T-CTA	GGAGTGGTGTGCCCGGCTGGTGCCGGGAGCAGTCTCTAAAACTGCCGACGCTGCGAGGCtGTAGGGTTCGATTCCCCACCATTCCGCCA
	A033	1141A-b3T-CTA	GGGGTGGTGTGCCCGGCTGGTGCCGGGAGCAGTCTCTAAAACTGCCGACGCTGCGAGGCtGTAGGGTTCGATTCCCCACCACTCCACCA
	S034	1141S-00b3-CTA	GGAGTGGTGTGCCCGGCTGGTGCCGGGAGCAGTCTCTAAAACTGCCGACGCTGTGCAGGCtGTTGGGTTCGATTCCCCACCATTCCGCCA
	A034	1141A-00b3-CTA	GGGGTGGTGTGCCCGGCTGGTGCCGGGAGCAGTCTCTAAAACTGCCGACGCTGTGCAGGCtGTTGGGTTCGATTCCCCACCACTCCACCA
	S035	1141S-GCb3-CTA	GGAGTGGTGTGCCCGGCTGGTGCCGGGAGCAGTCTCTAAAACTGCCGGCCGCGTGCAGCGtGCTGGGTTCGATTCCCCACCATTCCGCCA
	A035	1141A-GCb3-CTA	GGGGTGGTGTGCCCGGCTGGTGCCGGGAGCAGTCTCTAAAACTGCCGGCCGCGTGCAGCGtGCTGGGTTCGATTCCCCACCACTCCACCA
	S036	1141S-GCb3-A48-CTA	GGAGTGGTGTGCCCGGCTGGTGCCGGGAGCAGTCTCTAAAACTGCCGGCCGCGTGCAGCGtGCAGGGTTCGATTCCCCACCATTCCGCCA
	A036	1141A-GCb3-A48-CTA	GGGGTGGTGTGCCCGGCTGGTGCCGGGAGCAGTCTCTAAAACTGCCGGCCGCGTGCAGCGtGCAGGGTTCGATTCCCCACCACTCCACCA
	S037	1356S-CTA (8/4) allo-tRNA	GGAGGGCGTCTCGCTGGCGCGAGAAGCGGTCTCTAAAACCGCAAATGTCTTGACGGGCATTGGGGTCCGATCCCCCCGCCCTCCGCCA
	A037	1356A-CTA (8/4) allo-tRNA	GGGGGGCGTCTCGCTGGCGCGAGAAGCGGTCTCTAAAACCGCAAATGTCTTGACGGGCATTGGGGTCCGATCCCCCCGCCCTCCACCA
	S038	4139S-CTA (8/4) allo-tRNA	GGAGGGCGACAGGCCGGTGCCTGGAGCCGACTCTAAATCGGCGAATCCTTCGCAGGGATAGCGGTTCGACTCCGCCGCCCTCCGCCA
	S0385	4103S-CTA (8/4) allo-tRNA	GGAGGGTGTCACGCTGGTGCGTGGGCCGGTCTCTAAAACCGGAGATTCCTTGCCGGGAATGGAGTTCGATTCTCCCACCCTCCGCCA
	S039	1642S-CTA (8/4) allo-tRNA	GGGGGACACAACTCGTGGGTGCGAGAGTTGGTCTCTAAAACCAATGGCGTCGTTGCAGCGACGCAAGGTTCAATTCCTTTGTCCCCCGCCA
	A039	1642A-CTA (8/4) allo-tRNA	GGGGGACACAACTCGTGGGTGCGAGAGTTGGTCTCTAAAACCAATGGCGTCGTTGCAGCGACGCAAGGTTCAATTCCTTTGTCCTCCACCA
	S040	3368S-CTA (8/4) allo-tRNA	GGAGGGTGTCTAGCTGGTGCTAGGACCGGCCTCTAAAGCCGGATTACCTTTCCACGGGTATTGGGGTCCGATCCCCCCACCCTCCGCCA
	A040	3368A-CTA (8/4) allo-tRNA	GGGGGGTGTCTAGCTGGTGCTAGGACCGGCCTCTAAAGCCGGATTACCTTTCCACGGGTATTGGGGTCCGATCCCCCCACCCTCCACCA
	S041	4603S-CTA (8/4) allo-tRNA	GGAAGGTGACATCCGGTGATGGATGCGGTCTCTAAAACCGTAGGTCGCTGTGGCAGGCGATTGGGGTTCGACTCCTCCACCTTCCGCCA
	A041	4603A-CTA (8/4) allo-tRNA	GGGGGGTGACATCCGGTGATGGATGCGGTCTCTAAAACCGTAGGTCGCTGTGGCAGGCGATTGGGGTTCGACTCCTCCACCCTCCACCA
	S042	4631S-CTA (8/4) allo-tRNA	GGAAGGTGACATCCGGTGATGGACGCGGTCTCTAAAACCGTAGGTCGCTGGCAGGCGATTGGGGTTCGACTCCTCCACCTTCCGCCA
	A042	4631A-CTA (8/4) allo-tRNA	GGGGGGTGACATCCGGTGATGGACGCGGTCTCTAAAACCGTAGGTCGCTGGCAGGCGATTGGGGTTCGACTCCTCCACCCTCCACCA
	S043	short1739S-CTA	GGGAGCAGGTATGTGTCTGGGGACACGAGCGGTCTCTAAAACCGCGTGGGCCGTGTTCTGCACGGTCGGGTTCGATTCCCCCTGCTCCCGCCA
	A043	short1739A-CTA	GGGAGCAGGTATGTGTCTGGGGACACGAGCGGTCTCTAAAACCGCGTGGGCCGTGTTCTGCACGGTCGGGTTCGATTCCCCCTGCTTCCACCA
	S044	short1739S-b3T-CTA	GGGAGCAGGTATGTGTCTGGGGACACGAGCGGTCTCTAAAACCGCGTGGGCCGTGTTCTGCACGtGTCGGGTTCGATTCCCCCTGCTCCCGCCA
	A044	short1739A-b3T-CTA	GGGAGCAGGTATGTGTCTGGGGACACGAGCGGTCTCTAAAACCGCGTGGGCCGTGTTCTGCACGtGTCGGGTTCGATTCCCCCTGCTTCCACCA
	S045	short1739S-b2T-CTA	GGGAGCAGGTATGTGTCTGGGGACACGAGCGGTCTCTAAAACCGCGTGGGCCGTGTTCTGCACGGtCCGGGTTCGATTCCCCCTGCTCCCGCCA
	A045	short1739A-b2T-CTA	GGGAGCAGGTATGTGTCTGGGGACACGAGCGGTCTCTAAAACCGCGTGGGCCGTGTTCTGCACGGtCCGGGTTCGATTCCCCCTGCTTCCACCA
	S046	short1739S-rb2T-CTA	GGGAGCAGGTATGTGTCTGGGGACACGAGCGGTCTCTAAAACCGCGTGGGtCCGTGTTCTGCACGGCCGGGTTCGATTCCCCCTGCTCCCGCCA
	A046	short1739A-rb2T-CTA	GGGAGCAGGTATGTGTCTGGGGACACGAGCGGTCTCTAAAACCGCGTGGGtCCGTGTTCTGCACGGCCGGGTTCGATTCCCCCTGCTTCCACCA
	S047	3396S-CTA	GGAGGGCGGCTGCTGCTGGTGCAGCGGGTGGACTCTAAATCCACTGGAGCCTGTCGGGGCTAGGGTTCGATTCCCCCGCCCTCCGCCA
	A047	3396A-CTA	GGGGGGCGGCTGCTGCTGGTGCAGCGGGTGGACTCTAAATCCACTGGAGCCTGTCGGGGCTAGGGTTCGATTCCCCCGCCCTCCACCA
	S048	3396S-b3T-CTA	GGAGGGCGGCTGCTGCTGGTGCAGCGGGTGGACTCTAAATCCACTGGAGCCTGTCGGGGtCTAGGGTTCGATTCCCCCGCCCTCCGCCA
	A048	3396A-b3T-CTA	GGGGGGCGGCTGCTGCTGGTGCAGCGGGTGGACTCTAAATCCACTGGAGCCTGTCGGGGtCTAGGGTTCGATTCCCCCGCCCTCCACCA
	S049	3396S-GCb2T-CTA	GGAGGGCGGCTGCTGCTGGTGCAGCGGGTGGACTCTAAATCCACTGGGCCGCGTGCAGCGGtCCGGGTTCGATTCCCCCGCCCTCCGCCA
	A049	3396A-GCb2T-CTA	GGGGGGCGGCTGCTGCTGGTGCAGCGGGTGGACTCTAAATCCACTGGGCCGCGTGCAGCGGtCCGGGTTCGATTCCCCCGCCCTCCACCA
	S050	3396S-GCrb2T-CTA	GGAGGGCGGCTGCTGCTGGTGCAGCGGGTGGACTCTAAATCCACTGGGtCCGCGTGCAGCGGCCGGGTTCGATTCCCCCGCCCTCCGCCA
	A050	3396A-GCrb2T-CTA	GGGGGGCGGCTGCTGCTGGTGCAGCGGGTGGACTCTAAATCCACTGGGtCCGCGTGCAGCGGCCGGGTTCGATTCCCCCGCCCTCCACCA
	S051	4074S-CTA	GGAGGGTGGTCGCTGTTGGTGCAGCGGGCGGGCTCTAAACCCGCTGGAGCCTCACCGGGCTAAGGTTCGATTCCTCCACCCTCCGCCA
	A051	4074A-CTA	GGGGGGTGGTCGCTGTTGGTGCAGCGGGCGGGCTCTAAACCCGCTGGAGCCTCACCGGGCTAAGGTTCGATTCCTCCACCCTCCACCA
	S052	4074S-b3T-CTA	GGAGGGTGGTCGCTGTTGGTGCAGCGGGCGGGCTCTAAACCCGCTGGAGCCTCACCGGGtCTAAGGTTCGATTCCTCCACCCTCCGCCA
	A052	4074A-b3T-CTA	GGGGGGTGGTCGCTGTTGGTGCAGCGGGCGGGCTCTAAACCCGCTGGAGCCTCACCGGGtCTAAGGTTCGATTCCTCCACCCTCCACCA
	S053	4074S-GCb2T-CTA	GGAGGGTGGTCGCTGTTGGTGCAGCGGGCGGGCTCTAAACCCGCTGGGCCGCGTGCAGCGGtCCAGGTTCGATTCCTCCACCCTCCGCCA
	A053	4074A-GCb2T-CTA	GGGGGGTGGTCGCTGTTGGTGCAGCGGGCGGGCTCTAAACCCGCTGGGCCGCGTGCAGCGGtCCAGGTTCGATTCCTCCACCCTCCACCA
	S054	4074S-GCrb2T-CTA	GGAGGGTGGTCGCTGTTGGTGCAGCGGGCGGGCTCTAAACCCGCTGGGtCCGCGTGCAGCGGCCAGGTTCGATTCCTCCACCCTCCGCCA
	A054	4074A-GCrb2T-CTA	GGGGGGTGGTCGCTGTTGGTGCAGCGGGCGGGCTCTAAACCCGCTGGGtCCGCGTGCAGCGGCCAGGTTCGATTCCTCCACCCTCCACCA
	S055	1593S-CTA	GGAAGAGTCTCGTCCCCGGTGGGGCGCACGGACTCTAAATCCGCTGGGGGGGCGCTCGCGTTCCCCGGGGTTCGACTCCCAGCTCTTCCGCCA
	A055	1593A-CTA	GGGAGAGTCTCGTCCCCGGTGGGGCGCACGGACTCTAAATCCGCTGGGGGGGCGCTCGCGTTCCCCGGGGTTCGACTCCCAGCTCTTCCACCA
	S056	1593S-rb2T-CTA	GGAAGAGTCTCGTCCCCGGTGGGGCGCACGGACTCTAAATCCGCTGGGtGGGGCGCTCGCGTTCCCCGGGGTTCGACTCCCAGCTCTTCCGCCA
	A056	1593A-rb2T-CTA	GGGAGAGTCTCGTCCCCGGTGGGGCGCACGGACTCTAAATCCGCTGGGtGGGGCGCTCGCGTTCCCCGGGGTTCGACTCCCAGCTCTTCCACCA
	S057	1593S-rb2A-CTA	GGAAGAGTCTCGTCCCCGGTGGGGCGCACGGACTCTAAATCCGCTGGGaGGGGCGCTCGCGTTCCCCGGGGTTCGACTCCCAGCTCTTCCGCCA
	A057	1593A-rb2A-CTA	GGGAGAGTCTCGTCCCCGGTGGGGCGCACGGACTCTAAATCCGCTGGGaGGGGCGCTCGCGTTCCCCGGGGTTCGACTCCCAGCTCTTCCACCA
	S058	1593S-b2A-CTA	GGAAGAGTCTCGTCCCCGGTGGGGCGCACGGACTCTAAATCCGCTGGGGGGGCGCTCGCGTTCCaCCGGGGTTCGACTCCCAGCTCTTCCGCCA
	A058	1593A-b2A-CTA	GGGAGAGTCTCGTCCCCGGTGGGGCGCACGGACTCTAAATCCGCTGGGGGGGCGCTCGCGTTCCaCCGGGGTTCGACTCCCAGCTCTTCCACCA
	S059	1593S-b3A-CTA	GGAAGAGTCTCGTCCCCGGTGGGGCGCACGGACTCTAAATCCGCTGGGGGGGCGCTCGCGTTCaCCCGGGGTTCGACTCCCAGCTCTTCCGCCA
	A059	1593A-b3A-CTA	GGGAGAGTCTCGTCCCCGGTGGGGCGCACGGACTCTAAATCCGCTGGGGGGGCGCTCGCGTTCaCCCGGGGTTCGACTCCCAGCTCTTCCACCA
	S060	0000S-0A-b3T-CTA	GGACGGGGGTTCCGTCTGGTGACGGTCGCGGGCTCTAAACCCGTCAGGaACGCTGTGCAGGCtGTTAGGTTCGATTCCTCCCCCGTCCGCCA
	A060	0000A-0A-b3T-CTA	GGGCGGGGGTTCCGTCTGGTGACGGTCGCGGGCTCTAAACCCGTCAGGaACGCTGTGCAGGCtGTTAGGTTCGATTCCTCCCCCGTCCACCA
	S061	0000S-0A-GCb3T-CTA	GGACGGGGGTTCCGTCTGGTGACGGTCGCGGGCTCTAAACCCGTCAGGaGCCGCGTGCAGCGtGCTAGGTTCGATTCCTCCCCCGTCCGCCA
	A061	0000A-0A-GCb3T-CTA	GGGCGGGGGTTCCGTCTGGTGACGGTCGCGGGCTCTAAACCCGTCAGGaGCCGCGTGCAGCGtGCTAGGTTCGATTCCTCCCCCGTCCACCA
	S062	0000S-0A-GCb3A-CTA	GGACGGGGGTTCCGTCTGGTGACGGTCGCGGGCTCTAAACCCGTCAGGaGCCGCGTGCAGCGaGCTAGGTTCGATTCCTCCCCCGTCCGCCA
	A062	0000A-0A-GCb3A-CTA	GGGCGGGGGTTCCGTCTGGTGACGGTCGCGGGCTCTAAACCCGTCAGGaGCCGCGTGCAGCGaGCTAGGTTCGATTCCTCCCCCGTCCACCA
	S063	0000S-0A-GCb2T-CTA	GGACGGGGGTTCCGTCTGGTGACGGTCGCGGGCTCTAAACCCGTCAGGaGCCGCGTGCAGCGGtCTAGGTTCGATTCCTCCCCCGTCCGCCA
	A063	0000A-0A-GCb2T-CTA	GGGCGGGGGTTCCGTCTGGTGACGGTCGCGGGCTCTAAACCCGTCAGGaGCCGCGTGCAGCGGtCTAGGTTCGATTCCTCCCCCGTCCACCA
	S064	0000S-0A-GCb2A-CTA	GGACGGGGGTTCCGTCTGGTGACGGTCGCGGGCTCTAAACCCGTCAGGaGCCGCGTGCAGCGGaCTAGGTTCGATTCCTCCCCCGTCCGCCA
	A064	0000A-0A-GCb2A-CTA	GGGCGGGGGTTCCGTCTGGTGACGGTCGCGGGCTCTAAACCCGTCAGGaGCCGCGTGCAGCGGaCTAGGTTCGATTCCTCCCCCGTCCACCA
	S065	2225S-0A-GCb3T-CTA	GGAGGGGAACTTCTATCTGGTGATAGACGGGAACTCTAAATTCCTTGAaGGCCGCGTGCAGCGtGCCGGGTTCGATTCCCTTCCCCTCCGCCA
	A065	2225A-0A-GCb3T-CTA	GGGGGGGAACTTCTATCTGGTGATAGACGGGAACTCTAAATTCCTTGAaGGCCGCGTGCAGCGtGCCGGGTTCGATTCCCTTCCCCTCCACCA
	S066	2225S-0C-GCb3T-CTA	GGAGGGGAACTTCTATCTGGTGATAGACGGGAACTCTAAATTCCTTGAcGGCCGCGTGCAGCGtGCCGGGTTCGATTCCCTTCCCCTCCGCCA
	A066	2225A-0C-GCb3T-CTA	GGGGGGGAACTTCTATCTGGTGATAGACGGGAACTCTAAATTCCTTGAcGGCCGCGTGCAGCGtGCCGGGTTCGATTCCCTTCCCCTCCACCA
	S067	2225S-0A-GCb2T-CTA	GGAGGGGAACTTCTATCTGGTGATAGACGGGAACTCTAAATTCCTTGAaGGCCGCGTGCAGCGGtCCGGGTTCGATTCCCTTCCCCTCCGCCA
	A067	2225A-0A-GCb2T-CTA	GGGGGGGAACTTCTATCTGGTGATAGACGGGAACTCTAAATTCCTTGAaGGCCGCGTGCAGCGGtCCGGGTTCGATTCCCTTCCCCTCCACCA
	S068	2225S-0C-GCb2T-CTA	GGAGGGGAACTTCTATCTGGTGATAGACGGGAACTCTAAATTCCTTGAcGGCCGCGTGCAGCGGtCCGGGTTCGATTCCCTTCCCCTCCGCCA
	A068	2225A-0C-GCb2T-CTA	GGGGGGGAACTTCTATCTGGTGATAGACGGGAACTCTAAATTCCTTGAcGGCCGCGTGCAGCGGtCCGGGTTCGATTCCCTTCCCCTCCACCA
	S069	3218S-0T-b3A-CTA	GGAGAGTAGATTTCATGCGGTTATGAAATGCGTCTCTAAAACGCAGAGtGGGGCTACACACCCaCCAGGGTTCAACTCCCCTACTCTCCGCCA
	A069	3218A-0T-b3A-CTA	GGGGAGTAGATTTCATGCGGTTATGAAATGCGTCTCTAAAACGCAGAGtGGGGCTACACACCCaCCAGGGTTCAACTCCCCTACTCTCCACCA
	S070	2954S-0G-b3T-CTA	GGAGAGGGCAAGAGTGACGGTTCACTCACCCGTCTCTAAAACGGGTgAACGTCTATCCGGGCtGTTGGGTTCAATTCCCGCCCTCTCCGCCA
	A070	2954A-0G-b3T-CTA	GGGGAGGGCAAGAGTGACGGTTCACTCACCCGTCTCTAAAACGGGTgAACGTCTATCCGGGCtGTTGGGTTCAATTCCCGCCCTCTCCACCA
	S071	2954S-0C-b3T-CTA	GGAGAGGGCAAGAGTGACGGTTCACTCACCCGTCTCTAAAACGGGTcAACGTCTATCCGGGCtGTTGGGTTCAATTCCCGCCCTCTCCGCCA
	A071	2954A-0C-b3T-CTA	GGGGAGGGCAAGAGTGACGGTTCACTCACCCGTCTCTAAAACGGGTcAACGTCTATCCGGGCtGTTGGGTTCAATTCCCGCCCTCTCCACCA
	S072	1141S-0T-b3T-CTA	GGAGTGGTGTGCCCGGCTGGTGCCGGGAGCAGTCTCTAAAACTGCCGtACGCTGCGAGGCtGTAGGGTTCGATTCCCCACCATTCCGCCA
	A072	1141A-0T-b3T-CTA	GGGGTGGTGTGCCCGGCTGGTGCCGGGAGCAGTCTCTAAAACTGCCGtACGCTGCGAGGCtGTAGGGTTCGATTCCCCACCACTCCACCA
	S073	1141S-minus1A-b3T-CTA	GGAGTGGTGTGCCCGGCTGGTGCCGGGAGCAGTCTCTAAAACTGCCaGACGCTGCGAGGCtGTAGGGTTCGATTCCCCACCATTCCGCCA
	A073	1141A-minus1A-b3T-CTA	GGGGTGGTGTGCCCGGCTGGTGCCGGGAGCAGTCTCTAAAACTGCCaGACGCTGCGAGGCtGTAGGGTTCGATTCCCCACCACTCCACCA
	S074	3396S-0T-b3T-CTA	GGAGGGCGGCTGCTGCTGGTGCAGCGGGTGGACTCTAAATCCACTGGtAGCCTGTCGGGGtCTAGGGTTCGATTCCCCCGCCCTCCGCCA
	A074	3396A-0T-b3T-CTA	GGGGGGCGGCTGCTGCTGGTGCAGCGGGTGGACTCTAAATCCACTGGtAGCCTGTCGGGGtCTAGGGTTCGATTCCCCCGCCCTCCACCA
	S075	3396S-0A-GCb2T-CTA	GGAGGGCGGCTGCTGCTGGTGCAGCGGGTGGACTCTAAATCCACTGaGGCCGCGTGCAGCGGtCCGGGTTCGATTCCCCCGCCCTCCGCCA
	A075	3396A-0A-GCb2T-CTA	GGGGGGCGGCTGCTGCTGGTGCAGCGGGTGGACTCTAAATCCACTGaGGCCGCGTGCAGCGGtCCGGGTTCGATTCCCCCGCCCTCCACCA
	S076	4074S-0T-b3T-CTA	GGAGGGTGGTCGCTGTTGGTGCAGCGGGCGGGCTCTAAACCCGCTGGtAGCCTCACCGGGtCTAAGGTTCGATTCCTCCACCCTCCGCCA
	A076	4074A-0T-b3T-CTA	GGGGGGTGGTCGCTGTTGGTGCAGCGGGCGGGCTCTAAACCCGCTGGtAGCCTCACCGGGtCTAAGGTTCGATTCCTCCACCCTCCACCA
	S077	4074S-0A-GCb2T-CTA	GGAGGGTGGTCGCTGTTGGTGCAGCGGGCGGGCTCTAAACCCGCTGaGGCCGCGTGCAGCGGtCCAGGTTCGATTCCTCCACCCTCCGCCA
	A077	4074A-0A-GCb2T-CTA	GGGGGGTGGTCGCTGTTGGTGCAGCGGGCGGGCTCTAAACCCGCTGaGGCCGCGTGCAGCGGtCCAGGTTCGATTCCTCCACCCTCCACCA
	S078	short1739S-GtoA-delT-b2T-CTA	GGGAGCAGGTATGTGTCTGGGGACACGAGCGGTCTCTAAAACCGCGTGAGCCGTGTTCTGCACGtGCGGGTTCGATTCCCCCTGCTCCCGCCA
	A078	short1739A-GtoA-delT-b2T-CTA	GGGAGCAGGTATGTGTCTGGGGACACGAGCGGTCTCTAAAACCGCGTGAGCCGTGTTCTGCACGtGCGGGTTCGATTCCCCCTGCTTCCACCA
	S079	short1739S-GtoA-delT-b3T-CTA	GGGAGCAGGTATGTGTCTGGGGACACGAGCGGTCTCTAAAACCGCGTGAGCCGTGTTCTGCACtGGCGGGTTCGATTCCCCCTGCTCCCGCCA
	A079	short1739A-GtoA-delT-b3T-CTA	GGGAGCAGGTATGTGTCTGGGGACACGAGCGGTCTCTAAAACCGCGTGAGCCGTGTTCTGCACtGGCGGGTTCGATTCCCCCTGCTTCCACCA
	S080	0000S-GCb3TT-CTA	GGACGGGGGTTCCGTCTGGTGACGGTCGCGGGCTCTAAACCCGTCAGGGCCGCGTGCAGCGttGCTAGGTTCGATTCCTCCCCCGTCCGCCA
	A080	0000A-GCb3TT-CTA	GGGCGGGGGTTCCGTCTGGTGACGGTCGCGGGCTCTAAACCCGTCAGGGCCGCGTGCAGCGttGCTAGGTTCGATTCCTCCCCCGTCCACCA
	S081	0000S-GCb2TT-CTA	GGACGGGGGTTCCGTCTGGTGACGGTCGCGGGCTCTAAACCCGTCAGGGCCGCGTGCAGCGGttCTAGGTTCGATTCCTCCCCCGTCCGCCA
	A081	0000A-GCb2TT-CTA	GGGCGGGGGTTCCGTCTGGTGACGGTCGCGGGCTCTAAACCCGTCAGGGCCGCGTGCAGCGGttCTAGGTTCGATTCCTCCCCCGTCCACCA
	S082	0000S-GCrb2TT-CTA	GGACGGGGGTTCCGTCTGGTGACGGTCGCGGGCTCTAAACCCGTCAGGGttGCGCGTGCAGCGCCTAGGTTCGATTCCTCCCCCGTCCGCCA
	A082	0000A-GCrb2TT-CTA	GGGCGGGGGTTCCGTCTGGTGACGGTCGCGGGCTCTAAACCCGTCAGGGttGCGCGTGCAGCCGCTAGGTTCGATTCCTCCCCCGTCCACCA
	S083	2225S-GCb3TT-CTA	GGAGGGGAACTTCTATCTGGTGATAGACGGGAACTCTAAATTCCTTGAGGCCGCGTGCAGCGttGCCGGGTTCGATTCCCTTCCCCTCCGCCA
	A083	2225A-GCb3TT-CTA	GGGGGGGAACTTCTATCTGGTGATAGACGGGAACTCTAAATTCCTTGAGGCCGCGTGCAGCGttGCCGGGTTCGATTCCCTTCCCCTCCACCA
	S084	2225S-GCb2TT-CTA	GGAGGGGAACTTCTATCTGGTGATAGACGGGAACTCTAAATTCCTTGAGGCCGCGTGCAGCGGttCCGGGTTCGATTCCCTTCCCCTCCGCCA
	A084	2225A-GCb2TT-CTA	GGGGGGGAACTTCTATCTGGTGATAGACGGGAACTCTAAATTCCTTGAGGCCGCGTGCAGCGGttCCGGGTTCGATTCCCTTCCCCTCCACCA
	S085	2225S-GCrb2TT-CTA	GGAGGGGAACTTCTATCTGGTGATAGACGGGAACTCTAAATTCCTTGAGGttCCGCGTGCAGCGGCCGGGTTCGATTCCCTTCCCCTCCGCCA
	A085	2225A-GCrb2TT-CTA	GGGGGGGAACTTCTATCTGGTGATAGACGGGAACTCTAAATTCCTTGAGGttCCGCGTGCAGCGGCCGGGTTCGATTCCCTTCCCCTCCACCA
	S086	1141S-b3TT-CTA	GGAGTGGTGTGCCCGGCTGGTGCCGGGAGCAGTCTCTAAAACTGCCGACGCTGCGAGGCttGTAGGGTTCGATTCCCCACCATTCCGCCA
	A086	1141A-b3TT-CTA	GGGGTGGTGTGCCCGGCTGGTGCCGGGAGCAGTCTCTAAAACTGCCGACGCTGCGAGGCttGTAGGGTTCGATTCCCCACCACTCCACCA
	S087	3396S-b3TT-CTA	GGAGGGCGGCTGCTGCTGGTGCAGCGGGTGGACTCTAAATCCACTGGAGCCTGTCGGGGttCTAGGGTTCGATTCCCCCGCCCTCCGCCA
	A087	3396A-b3TT-CTA	GGGGGGCGGCTGCTGCTGGTGCAGCGGGTGGACTCTAAATCCACTGGAGCCTGTCGGGGttCTAGGGTTCGATTCCCCCGCCCTCCACCA
	S088	3396S-GCb2TT-CTA	GGAGGGCGGCTGCTGCTGGTGCAGCGGGTGGACTCTAAATCCACTGGGCCGCGTGCAGCGGttCCGGGTTCGATTCCCCCGCCCTCCGCCA
	A088	3396A-GCb2TT-CTA	GGGGGGCGGCTGCTGCTGGTGCAGCGGGTGGACTCTAAATCCACTGGGCCGCGTGCAGCGGttCCGGGTTCGATTCCCCCGCCCTCCACCA
	S089	3396S-GCrb2TT-CTA	GGAGGGCGGCTGCTGCTGGTGCAGCGGGTGGACTCTAAATCCACTGGGttCCGCGTGCAGCGGCCGGGTTCGATTCCCCCGCCCTCCGCCA
	A089	3396A-GCrb2TT-CTA	GGGGGGCGGCTGCTGCTGGTGCAGCGGGTGGACTCTAAATCCACTGGGttCCGCGTGCAGCGGCCGGGTTCGATTCCCCCGCCCTCCACCA
	S090	4074S-b3TT-CTA	GGAGGGTGGTCGCTGTTGGTGCAGCGGGCGGGCTCTAAACCCGCTGGAGCCTCACCGGGttCTAAGGTTCGATTCCTCCACCCTCCGCCA
	A090	4074A-b3TT-CTA	GGGGGGTGGTCGCTGTTGGTGCAGCGGGCGGGCTCTAAACCCGCTGGAGCCTCACCGGGttCTAAGGTTCGATTCCTCCACCCTCCACCA
	S091	4074S-GCb2TT-CTA	GGAGGGTGGTCGCTGTTGGTGCAGCGGGCGGGCTCTAAACCCGCTGGGCCGCGTGCAGCGGttCCAGGTTCGATTCCTCCACCCTCCGCCA
	A091	4074A-GCb2TT-CTA	GGGGGGTGGTCGCTGTTGGTGCAGCGGGCGGGCTCTAAACCCGCTGGGCCGCGTGCAGCGGttCCAGGTTCGATTCCTCCACCCTCCACCA
	S092	4074S-GCrb2TT-CTA	GGAGGGTGGTCGCTGTTGGTGCAGCGGGCGGGCTCTAAACCCGCTGGGttCCGCGTGCAGCGGCCAGGTTCGATTCCTCCACCCTCCGCCA
	A092	4074A-GCrb2TT-CTA	GGGGGGTGGTCGCTGTTGGTGCAGCGGGCGGGCTCTAAACCCGCTGGGttCCGCGTGCAGCGGCCAGGTTCGATTCCTCCACCCTCCACCA
	S093	short1593S-b2TT-CTA	GGAAGAGTCTCGTCCCCGGTGGGGCGCACGGACTCTAAATCCGCTGGGGGGCGCTCGCGTCCttCCGGGGTTCGACTCCCAGCTCTTCCGCCA
	A093	short1593A-b2TT-CTA	GGGAGAGTCTCGTCCCCGGTGGGGCGCACGGACTCTAAATCCGCTGGGGGGCGCTCGCGTCCttCCGGGGTTCGACTCCCAGCTCTTCCACCA
	S094	short1593S-rb2TT-CTA	GGAAGAGTCTCGTCCCCGGTGGGGCGCACGGACTCTAAATCCGCTGGGttGGGCGCTCGCGTCCCCGGGGTTCGACTCCCAGCTCTTCCGCCA
	A094	short1593A-rb2TT-CTA	GGGAGAGTCTCGTCCCCGGTGGGGCGCACGGACTCTAAATCCGCTGGGttGGGCGCTCGCGTCCCCGGGGTTCGACTCCCAGCTCTTCCACCA
	SEC0	A005_SECIS-0	GGGCGGGGGTTCCGTCTGGTGACGGTCGCGGGCTCTAAACCCGTCAGGACGGGTTGCAGGTCTGCACCCGaTTAGGTTCGATTCCTCCCCCGTCCACCA
	SEC1	A005_SECIS-1	GGGCGGGGGTTCCGTCTGGTGACGGTCGCGGGCTCTAAACCCGTCAGGACGCGGTTGCAGGTCTGCACCGCGaTTAGGTTCGATTCCTCCCCCGTCCACCA
	SEC2	A005_SECIS-2	GGGCGGGGGTTCCGTCTGGTGACGGTCGCGGGCTCTAAACCCGTCAGGACGCTGGTTGCAGGTCTGCACCAGCGaTTAGGTTCGATTCCTCCCCCGTCCACCA
	MS20	A005_MS2-0	GGGCGGGGGTTCCGTCTGGTGACGGTCGCGGGCTCTAAACCCGTCAGGACGACATGAGGATTACCCATGTCGaTTAGGTTCGATTCCTCCCCCGTCCACCA
	MS21	A005_MS2-1	GGGCGGGGGTTCCGTCTGGTGACGGTCGCGGGCTCTAAACCCGTCAGGACGCACATGAGGATTACCCATGTGCGaTTAGGTTCGATTCCTCCCCCGTCCACCA
	MS22	A005_MS2-2	GGGCGGGGGTTCCGTCTGGTGACGGTCGCGGGCTCTAAACCCGTCAGGACGCGACATGAGGATTACCCATGTCGCGaTTAGGTTCGATTCCTCCCCCGTCCACCA
	PP71	S012_PP7-1	GGAGGGGAACTTCTATCTGGTGATAGACGGGAACTCTAAATTCCTTGAAATGCGGAGTTTATATGGAAACCCGCATTGGGTTCGATTCCCTTCCCCTCCGCCA
	MS2c1	S012_MS2c-1	GGAGGGGAACTTCTATCTGGTGATAGACGGGAACTCTAAATTCCTTGAAATGCACATGAGGATcACCCATGTGCATTGGGTTCGATTCCCTTCCCCTCCGCCA
	MS2c0	S012_MS2c-0	GGAGGGGAACTTCTATCTGGTGATAGACGGGAACTCTAAATTCCTTGAATGCACATGAGGATcACCCATGTGCATGGGTTCGATTCCCTTCCCCTCCGCCA
	MS2cm1	S012_MS2c-m1	GGAGGGGAACTTCTATCTGGTGATAGACGGGAACTCTAAATTCCTTGAAGCACATGAGGATcACCCATGTGCTGGGTTCGATTCCCTTCCCCTCCGCCA
	MS2cm2	S012_MS24c-m2	GGAGGGGAACTTCTATCTGGTGATAGACGGGAACTCTAAATTCCTTGAAATGCTGAGGATcACCCAGCATTGGGTTCGATTCCCTTCCCCTCCGCCA
	MjYR	MjYR_Nap3	CCCGCCTTAGTTCAGCAGGGCAGAACGGCGGACTCTAAATCCGCATGGCACGGGTTCAAATCCCGTAGGCGGGACCA
	Y005	Y005	CGACGGGGGTTCCGTCTGGTGACGGTCGCGGGCTCTAAACCCGTCAGGACGCTGTGCAGGCGaTTAGGTTCGATTCCTCCCCCGTCGACCA
	Y022	Y022	CGAGAGTAGATTTCATGCGGTTATGAAATGCGTCTCTAAAACGCAGAGGGGGCTACACACCCaCCAGGGTTCAACTCCCCTACTCTCGACCA
	Y052	Y052	CGAGGGTGGTCGCTGTTGGTGCAGCGGGCGGGCTCTAAACCCGCTGGAGCCTCACCGGGtCTAAGGTTCGATTCCTCCACCCTCGACCA
	Y072	Y072-1	CGAGTGGTGTGCCCGGCTGGTGCCGGGAGCAGTCTCTAAAACTGCCGtACGCTGCGAGGCtGTAGGGTTCGATTCCCCACCATTCGACCA
	Y072-2	Y072-2	CGAGTGGTGTGCCCGGCTGGTGCCGGGAGCAGTCTCTAAAACTGCCGtACGCTGCGAGGCtGTAGGGTTCGATTCCCCACCACTCGACCA
	Y072-3	Y072-3	CCCGTGGTGTGCCCGGCTGGTGCCGGGAGCAGTCTCTAAAACTGCCGtACGCTGCGAGGCtGTAGGGTTCGATTCCCCACCACGGGACCA
	Y073	Y073	CGAGTGGTGTGCCCGGCTGGTGCCGGGAGCAGTCTCTAAAACTGCCaGACGCTGCGAGGCtGTAGGGTTCGATTCCCCACCATTCGACCA
	Y079	Y079	CGGAGCAGGTATGTGTCTGGGGACACGAGCGGTCTCTAAAACCGCGTGAGCCGTGTTCTGCACtGGCGGGTTCGATTCCCCCTGCTCCGACCA
	S005M	S005_MS2-1	GGACGGGGGTTCCGTCTGGTGACGGTCGCGGGCTCTAAACCCGTCAGGACGCACATGAGGATTACCCATGTGCGaTTAGGTTCGATTCCTCCCCCGTCCGCCA
	Y005M	Y005_MS2-1	CGACGGGGGTTCCGTCTGGTGACGGTCGCGGGCTCTAAACCCGTCAGGACGCACATGAGGATTACCCATGTGCGaTTAGGTTCGATTCCTCCCCCGTCGACCA
	H073	H073	GGTAGTGGTGTGCCCGGCTGGTGCCGGGAGCAGTCTCTAAAACTGCCaGACGCTGCGAGGCtGTAGGGTTCGATTCCCCACCATTACCCCA
	H073-1	H073_ψHis-1	GGTAGTGGTGTGCCCGGCTGGTGCCGGGAGCAGTCTCTAAAACTGCCaGACGCATTGTGATTGCtGTAGGGTTCGATTCCCCACCATTACCCCA
	H073-a	H073_ψHis-1(GAG)	GGTAGTGGTGTGCCCGGCTGGTGCCGGGAGCAGTCTCTAAAACTGCCaGACGCATTGaGATTGCtGTAGGGTTCGATTCCCCACCATTACCCCA
	H073-2	H073_ψHis-2	GGTAGTGGTGTGCCCGGCTGGTGCCGGGAGCAGTCTCTAAAACTGCCaGACGCGATTGTGATTCGCtGTAGGGTTCGATTCCCCACCATTACCCCA
	H073-3	H073_ψHis-3	GGTAGTGGTGTGCCCGGCTGGTGCCGGGAGCAGTCTCTAAAACTGCCaGACGCGGATTGTGATTCCGCtGTAGGGTTCGATTCCCCACCATTACCCCA
	H072-1	H072_ψHis-1	GGTAGTGGTGTGCCCGGCTGGTGCCGGGAGCAGTCTCTAAAACTGCCGtACGCATTGTGATTGCtGTAGGGTTCGATTCCCCACCATTACCCCA
	H072-a	H072_ψHis-1(GAG)	GGTAGTGGTGTGCCCGGCTGGTGCCGGGAGCAGTCTCTAAAACTGCCGtACGCATTGaGATTGCtGTAGGGTTCGATTCCCCACCATTACCCCA
	H072-b	H072_ψHis-1(GCG)	GGTAGTGGTGTGCCCGGCTGGTGCCGGGAGCAGTCTCTAAAACTGCCGtACGCATTGcGATTGCtGTAGGGTTCGATTCCCCACCATTACCCCA
	H072-c	H072_ψHis-1(UUG)	GGTAGTGGTGTGCCCGGCTGGTGCCGGGAGCAGTCTCTAAAACTGCCGtACGCATTttGATTGCtGTAGGGTTCGATTCCCCACCATTACCCCA
	H072-d	H072_ψHis-1p	GGTAGTGGTGTGCCCGGCTGGTGCCGGGAGCAGTCTCTAAAACTGCCGtACGCATTgGTGgTGCtGTAGGGTTCGATTCCCCACCATTACCCCA
	H072-e	H072_ψHis-1m	GGTAGTGGTGTGCCCGGCTGGTGCCGGGAGCAGTCTCTAAAACTGCCGtACGCAgGTGtTTGCtGTAGGGTTCGATTCCCCACCATTACCCCA
	H072-f	H072_ψHis-0	GGTAGTGGTGTGCCCGGCTGGTGCCGGGAGCAGTCTCTAAAACTGCCGtACGCTTGTGATGCtGTAGGGTTCGATTCCCCACCATTACCCCA
	H072-g	H072_ψHis-0p	GGTAGTGGTGTGCCCGGCTGGTGCCGGGAGCAGTCTCTAAAACTGCCGtACGCTTgGTGgGCtGTAGGGTTCGATTCCCCACCATTACCCCA
	H072-h	H072_ψHis-0m	GGTAGTGGTGTGCCCGGCTGGTGCCGGGAGCAGTCTCTAAAACTGCCGtACGCgGTGtTGCtGTAGGGTTCGATTCCCCACCATTACCCCA
	H005-a	H005_ψHis-1	GGTACGGGGGTTCCGTCTGGTGACGGTCGCGGGCTCTAAACCCGTCAGGACGCATTGTGATTGCGaTTAGGTTCGATTCCTCCCCCGTACCCCA
	H005-b	H005_ψHis-1p	GGTACGGGGGTTCCGTCTGGTGACGGTCGCGGGCTCTAAACCCGTCAGGACGCATTgGTGgTGCGaTTAGGTTCGATTCCTCCCCCGTACCCCA
	H005-c	H005_ψHis-1m	GGTACGGGGGTTCCGTCTGGTGACGGTCGCGGGCTCTAAACCCGTCAGGACGCAgGTGtTTGCGaTTAGGTTCGATTCCTCCCCCGTACCCCA
	H005-d	H005_ψHis-0	GGTACGGGGGTTCCGTCTGGTGACGGTCGCGGGCTCTAAACCCGTCAGGACGCTTGTGATGCGaTTAGGTTCGATTCCTCCCCCGTACCCCA
	H005-e	H005_ψHis-0p	GGTACGGGGGTTCCGTCTGGTGACGGTCGCGGGCTCTAAACCCGTCAGGACGCTTgGTGgGCGaTTAGGTTCGATTCCTCCCCCGTACCCCA
	H005-f	H005_ψHis-0m	GGTACGGGGGTTCCGTCTGGTGACGGTCGCGGGCTCTAAACCCGTCAGGACGCgGTGtTGCGaTTAGGTTCGATTCCTCCCCCGTACCCCA
	H072-i	H072_bTAR-1	GGTAGTGGTGTGCCCGGCTGGTGCCGGGAGCAGTCTCTAAAACTGCCGtACGCCTCGTGTAGCTCATTAGCTCCGAGGCtGTAGGGTTCGATTCCCCACCATTACCCCA
	H072-j	H072_rbTAR-1	GGTAGTGGTGTGCCCGGCTGGTGCCGGGAGCAGTCTCTAAAACTGCCGtACGCAGCTCCGAGCATTCTCGTGTAGCTGCtGTAGGGTTCGATTCCCCACCATTACCCCA
	H072-k	H072_βSECIS-1	GGTAGTGGTGTGCCCGGCTGGTGCCGGGAGCAGTCTCTAAAACTGCCGtACGCGTCGCCGGTGTGGCGAATGCtGTAGGGTTCGATTCCCCACCATTACCCCA
	H072-l	H072_λboxB-0	GGTAGTGGTGTGCCCGGCTGGTGCCGGGAGCAGTCTCTAAAACTGCCGtACGCCCTgaaaaAGGGCtGTAGGGTTCGATTCCCCACCATTACCCCA
	H072-m	H072_7SK-1	GGTAGTGGTGTGCCCGGCTGGTGCCGGGAGCAGTCTCTAAAACTGCCGtACGCTGCATGTGGCAGCtGTAGGGTTCGATTCCCCACCATTACCCCA
	H072-n	H072_7SK311a-1	GGTAGTGGTGTGCCCGGCTGGTGCCGGGAGCAGTCTCTAAAACTGCCGtACGCTGCAaGTGGCAGCtGTAGGGTTCGATTCCCCACCATTACCCCA
	H072-o	H072_7SK-b	GGTAGTGGTGTGCCCGGCTGGTGCCGGGAGCAGTCTCTAAAACTGCCGtACGCTGCATGTGGCAGtctGTAGGGTTCGATTCCCCACCATTACCCCA
	H072-p	H072_7SK311a-b	GGTAGTGGTGTGCCCGGCTGGTGCCGGGAGCAGTCTCTAAAACTGCCGtACGCTGCAaGTGGCAGtctGTAGGGTTCGATTCCCCACCATTACCCCA
	H072-3	H072_αψHis-3	GGTAGTGGTGTGCCCGGCTGGTGCCGGGAGCAGTCTCTAAAACTGCCGtACGCGGATTGTGGCTCCGCtGTAGGGTTCGATTCCCCACCATTACCCCA
	αH005-3	αH005_αψHis-3	GCGAGGGGGTTCCGTCTGGTGACGGTCGCGGGCTCTAAACCCGTCAGGACGCGGATTGTGGCTCCGCGaTTAGGTTCGATTCCTCCCCCTCGTACCA
	αH005-4	αH005_αψHis-4	GCGAGGGGGTTCCGTCTGGTGACGGTCGCGGGCTCTAAACCCGTCAGGACGCAGGATTGTGGCTCCTGCGaTTAGGTTCGATTCCTCCCCCTCGTACCA
	αH005-5	αH005_αψHis-5	GCGAGGGGGTTCCGTCTGGTGACGGTCGCGGGCTCTAAACCCGTCAGGACGCACGGATTGTGGCTCCGTGCGaTTAGGTTCGATTCCTCCCCCTCGTACCA
	αH005-a	αH005_αψHis-4(UUG)	GCGAGGGGGTTCCGTCTGGTGACGGTCGCGGGCTCTAAACCCGTCAGGACGCAGGATTtTGGCTCCTGCGaTTAGGTTCGATTCCTCCCCCTCGTACCA
	αH005-b	αH005_αψHis-4(GUU)	GCGAGGGGGTTCCGTCTGGTGACGGTCGCGGGCTCTAAACCCGTCAGGACGCAGGATTGTtGCTCCTGCGaTTAGGTTCGATTCCTCCCCCTCGTACCA
	αH005-c	αH005_αψHis-4(GCG)	GCGAGGGGGTTCCGTCTGGTGACGGTCGCGGGCTCTAAACCCGTCAGGACGCAGGATTGcGGCTCCTGCGaTTAGGTTCGATTCCTCCCCCTCGTACCA

## Sheet: Protein
	protein name	amino-acid sequence	nucleotide sequence
	CAT	MEKKITGYTTVDISQWHRKEHFEAFQSVAQCTYNQTVQLDITAFLKTVKKNKHKFYPAFIHILARLMNAHPEFRMAMKDGELVIWDSVHPCYTVFHEQTETFSSLWSEYHDDFRQFLHIYSQDVACYGENLAYFPKGFIENMFFVSANPWVSFTSFDLNVANMDNFFAPVFTMGKYYTQGDKVLMPLAIQVHHAVCDGFHVGRMLNELQQYCDEWQGGA	ATGGAGAAAAAAATCACTGGATATACCACCGTTGATATATCCCAATGGCATCGTAAAGAACATTTTGAGGCATTTCAGTCAGTTGCTCAATGTACCTATAACCAGACCGTTCAGCTGGATATTACGGCCTTTTTAAAGACCGTAAAGAAAAATAAGCACAAGTTTTATCCGGCCTTTATTCACATTCTTGCCCGCCTGATGAATGCTCATCCGGAATTCCGTATGGCAATGAAAGACGGTGAGCTGGTGATATGGGATAGTGTTCACCCTTGTTACACCGTTTTCCATGAGCAAACTGAAACGTTTTCATCGCTCTGGAGTGAATACCACGACGATTTCCGGCAGTTTCTACACATATATTCGCAAGATGTGGCGTGTTACGGTGAAAACCTGGCCTAT…
	MS2 coat protein	MASNFTQFVLVDNGGTGDVTVAPSNFANGVAEWISSNSRSQAYKVTCSVRQSSAQNRKYTIKVEVPKVATQTVGGVELPVAAWRSYLNMELTIPIFATNSDCELIVKAMQGLLKDGNPIPSAIAANSGIY	ATGGCTTCTAACTTTACTCAGTTCGTTCTCGTCGACAATGGCGGAACTGGCGACGTGACTGTCGCCCCAAGCAACTTCGCTAACGGGGTCGCTGAATGGATCAGCTCTAACTCGCGTTCACAGGCTTACAAAGTAACCTGTAGCGTTCGTCAGAGCTCTGCGCAGAATCGCAAATACACCATCAAAGTCGAGGTGCCTAAAGTGGCAACCCAGACTGTTGGTGGTGTAGAGCTTCCTGTAGCCGCATGGCGTTCGTACTTAAATATGGAACTAACCATTCCAATTTTCGCTACGAATTCCGACTGCGAGCTTATTGTTAAGGCAATGCAAGGTCTCCTAAAAGAcGGAAACCCGATTCCCTCAGCAATCGCAGCAAACTCCGGCATCTACTAA
	MS2 coat protein (V29I)	MASNFTQFVLVDNGGTGDVTVAPSNFANGIAEWISSNSRSQAYKVTCSVRQSSAQNRKYTIKVEVPKVATQTVGGVELPVAAWRSYLNMELTIPIFATNSDCELIVKAMQGLLKDGNPIPSAIAANSGIY	ATGGCTTCTAACTTTACTCAGTTCGTTCTCGTCGACAATGGCGGAACTGGCGACGTGACTGTCGCCCCAAGCAACTTCGCTAACGGGaTCGCTGAATGGATCAGCTCTAACTCGCGTTCACAGGCTTACAAAGTAACCTGTAGCGTTCGTCAGAGCTCTGCGCAGAATCGCAAATACACCATCAAAGTCGAGGTGCCTAAAGTGGCAACCCAGACTGTTGGTGGTGTAGAGCTTCCTGTAGCCGCATGGCGTTCGTACTTAAATATGGAACTAACCATTCCAATTTTCGCTACGAATTCCGACTGCGAGCTTATTGTTAAGGCAATGCAAGGTCTCCTAAAAGAcGGAAACCCGATTCCCTCAGCAATCGCAGCAAACTCCGGCATCTACTAA
	PP7 coat protein	MSKTIVLSVGEATRTLTEIQSTADRQIFEEKVGPLVGRLRLTASLRQNGAKTAYRVNLKLDQADVVDCSTSVCGELPKVRYTQVWSHDVTIVANSTEASRKSLYDLTKSLVATSQVEDLVVNLVPLGR	ATGAGCAAAACCATTGTTCTGAGCGTTGGTGAAGCAACCCGTACACTGACCGAAATTCAGAGCACCGCAGATCGTCAGATTTTTGAAGAAAAAGTTGGTCCGCTGGTTGGTCGTCTGCGTCTGACCGCAAGCCTGCGTCAGAATGGTGCAAAAACCGCATATCGTGTTAATCTGAAACTGGATCAGGCAGATGTTGTTGATTGTAGCACCAGCGTTTGTGGTGAACTGCCGAAAGTTCGTTATACCCAGGTTTGGAGCCATGATGTTACCATTGTTGCAAATAGCACCGAAGCAAGCCGTAAAAGCCTGTATGATCTGACCAAAAGCCTGGTTGCGACCAGCCAGGTTGAAGATCTGGTTGTGAATCTGGTTCCGCTGGGTCGTTAA
	SUMO	MSDSEVNQEAKPEVKPEVKPETHINLKVSDGSSEIFFKIKKTTPLRRLMEAFAKRQGKEMDSLTFLYDGIEIQADQTPEDLDMEDNDIIEAHREQIGG	ATGTCGGACTCAGAAGTCAATCAAGAAGCTAAGCCAGAGGTCAAGCCAGAAGTCAAGCCTGAGACTCACATCAATTTAAAGGTGTCCGATGGATCTTCAGAGATCTTCTTCAAGATCAAAAAGACCACTCCTTTAAGAAGGCTGATGGAAGCGTTCGCTAAAAGACAGGGTAAGGAAATGGACTCCTTAACGTTCTTGTACGACGGTATTGAAATTCAAGCTGATCAGACCCCTGAAGATTTGGACATGGAGGATAACGATATTATTGAGGCTCACCGCGAACAGATTGGAGGTTAA
	SUMO-His-AaSelA-N	MSDSEVNQEAKPEVKPEVKPETHINLKVSDGSSEIFFKIKKTTPLRRLMEAFAKRQGKEMDSLTFLYDGIEIQADQTPEDLDMEDNDIIEAHREQIGGAHHHHHHRLSGSMKSLLRQIPQISKVVEIFKKKYPEAYVVKAAREVAEKYRKEIIEGKRKDLNGFLEDVERKIKSLMK	ATGTCGGACTCAGAAGTCAATCAAGAAGCTAAGCCAGAGGTCAAGCCAGAAGTCAAGCCTGAGACTCACATCAATTTAAAGGTGTCCGATGGATCTTCAGAGATCTTCTTCAAGATCAAAAAGACCACTCCTTTAAGAAGGCTGATGGAAGCGTTCGCTAAAAGACAGGGTAAGGAAATGGACTCCTTAACGTTCTTGTACGACGGTATTGAAATTCAAGCTGATCAGACCCCTGAAGATTTGGACATGGAGGATAACGATATTATTGAGGCTCACCGCGAACAGATTGGAGGTgcacaccatcatcaccatcaccgtctgtctgggtctATGAAAAGCCTGCTGCGTCAGATTCCGCAGATTAGCAAAGTTGTGGAAATCTTCAAAAAAAAGTACCCG…
	SUMO-His-MjPSTK-C	MSDSEVNQEAKPEVKPEVKPETHINLKVSDGSSEIFFKIKKTTPLRRLMEAFAKRQGKEMDSLTFLYDGIEIQADQTPEDLDMEDNDIIEAHREQIGGAHHHHHHRLSGSNISDKIDKETRKIVSEYIKSKKLDKDKIKEVVELRKEFLKKIKKMEEVDADRVLKEFKDLLNSY	ATGTCGGACTCAGAAGTCAATCAAGAAGCTAAGCCAGAGGTCAAGCCAGAAGTCAAGCCTGAGACTCACATCAATTTAAAGGTGTCCGATGGATCTTCAGAGATCTTCTTCAAGATCAAAAAGACCACTCCTTTAAGAAGGCTGATGGAAGCGTTCGCTAAAAGACAGGGTAAGGAAATGGACTCCTTAACGTTCTTGTACGACGGTATTGAAATTCAAGCTGATCAGACCCCTGAAGATTTGGACATGGAGGATAACGATATTATTGAGGCTCACCGCGAACAGATTGGAGGTgcacaccatcatcaccatcaccgtctgtctgggtctAACATCAGCGATAAAATCGACAAAGAAACCCGCAAAATTGTGAGCGAGTACATCAAAAGCAAAAAGCTG…
	SUMO-His-MkPSTK-C	MSDSEVNQEAKPEVKPEVKPETHINLKVSDGSSEIFFKIKKTTPLRRLMEAFAKRQGKEMDSLTFLYDGIEIQADQTPEDLDMEDNDIIEAHREQIGGAHHHHHHRLSGSSSVNEVDVRTRQVMGELMRRLSETGAATQELGRKLSELRREIVSSVEDPEKAVREFRRRAEEVIRECLHGDG	ATGTCGGACTCAGAAGTCAATCAAGAAGCTAAGCCAGAGGTCAAGCCAGAAGTCAAGCCTGAGACTCACATCAATTTAAAGGTGTCCGATGGATCTTCAGAGATCTTCTTCAAGATCAAAAAGACCACTCCTTTAAGAAGGCTGATGGAAGCGTTCGCTAAAAGACAGGGTAAGGAAATGGACTCCTTAACGTTCTTGTACGACGGTATTGAAATTCAAGCTGATCAGACCCCTGAAGATTTGGACATGGAGGATAACGATATTATTGAGGCTCACCGCGAACAGATTGGAGGTgcacaccatcatcaccatcaccgtctgtctgggtctAGCAGCGTTAATGAAGTTGATGTTCGTACCCGTCAGGTTATGGGTGAACTGATGCGTCGTCTGAGCGAA…
	SUMO-His-AaSelA-N-MjPSTK-C	MSDSEVNQEAKPEVKPEVKPETHINLKVSDGSSEIFFKIKKTTPLRRLMEAFAKRQGKEMDSLTFLYDGIEIQADQTPEDLDMEDNDIIEAHREQIGGAHHHHHHRLSGSMKSLLRQIPQISKVVEIFKKKYPEAYVVKAAREVAEKYRKEIIEGKRKDLNGFLEDVERKIKSLMKNNNISDKIDKETRKIVSEYIKSKKLDKDKIKEVVELRKEFLKKIKKMEEVDADRVLKEFKDLLNSY	ATGTCGGACTCAGAAGTCAATCAAGAAGCTAAGCCAGAGGTCAAGCCAGAAGTCAAGCCTGAGACTCACATCAATTTAAAGGTGTCCGATGGATCTTCAGAGATCTTCTTCAAGATCAAAAAGACCACTCCTTTAAGAAGGCTGATGGAAGCGTTCGCTAAAAGACAGGGTAAGGAAATGGACTCCTTAACGTTCTTGTACGACGGTATTGAAATTCAAGCTGATCAGACCCCTGAAGATTTGGACATGGAGGATAACGATATTATTGAGGCTCACCGCGAACAGATTGGAGGTgcacaccatcatcaccatcaccgtctgtctgggtctATGAAAAGCCTGCTGCGTCAGATTCCGCAGATTAGCAAAGTTGTGGAAATCTTCAAAAAAAAGTACCCG…
	SUMO-His-MkPSTK-C-M4622PSTK-C (from Ga0256835_100014622)	MSDSEVNQEAKPEVKPEVKPETHINLKVSDGSSEIFFKIKKTTPLRRLMEAFAKRQGKEMDSLTFLYDGIEIQADQTPEDLDMEDNDIIEAHREQIGGAHHHHHHRLSGSSSVNEVDVRTRQVMGELMRRLSETGAATQELGRKLSELRREIVSSVEDPEKAVREFRRRAEEVIRECLHGDGEENKNKNNSSVDEVDVRTRRVLREMLSRAAEEGSLTPEVAEEANRIRREIASSLDDPEEAERELRRRVGELLGCSRG	ATGTCGGACTCAGAAGTCAATCAAGAAGCTAAGCCAGAGGTCAAGCCAGAAGTCAAGCCTGAGACTCACATCAATTTAAAGGTGTCCGATGGATCTTCAGAGATCTTCTTCAAGATCAAAAAGACCACTCCTTTAAGAAGGCTGATGGAAGCGTTCGCTAAAAGACAGGGTAAGGAAATGGACTCCTTAACGTTCTTGTACGACGGTATTGAAATTCAAGCTGATCAGACCCCTGAAGATTTGGACATGGAGGATAACGATATTATTGAGGCTCACCGCGAACAGATTGGAGGTgcacaccatcatcaccatcaccgtctgtctgggtctAGCAGCGTTAATGAAGTTGATGTTCGTACCCGTCAGGTTATGGGTGAACTGATGCGTCGTCTGAGCGAA…
	SUMO-His-MkPSTK-C-M1346PSTK-C (from Ga0256842_1000001346)	MSDSEVNQEAKPEVKPEVKPETHINLKVSDGSSEIFFKIKKTTPLRRLMEAFAKRQGKEMDSLTFLYDGIEIQADQTPEDLDMEDNDIIEAHREQIGGAHHHHHHRLSGSSSVNEVDVRTRQVMGELMRRLSETGAATQELGRKLSELRREIVSSVEDPEKAVREFRRRAEEVIRECLHGDGEENKNKNNESVDEVDQATRKVMGEIMRRAAEEGTASQELGEVLSRIRREIVSECDDPEEAVERFRERAEEVLRKWSGGD	ATGTCGGACTCAGAAGTCAATCAAGAAGCTAAGCCAGAGGTCAAGCCAGAAGTCAAGCCTGAGACTCACATCAATTTAAAGGTGTCCGATGGATCTTCAGAGATCTTCTTCAAGATCAAAAAGACCACTCCTTTAAGAAGGCTGATGGAAGCGTTCGCTAAAAGACAGGGTAAGGAAATGGACTCCTTAACGTTCTTGTACGACGGTATTGAAATTCAAGCTGATCAGACCCCTGAAGATTTGGACATGGAGGATAACGATATTATTGAGGCTCACCGCGAACAGATTGGAGGTgcacaccatcatcaccatcaccgtctgtctgggtctAGCAGCGTTAATGAAGTTGATGTTCGTACCCGTCAGGTTATGGGTGAACTGATGCGTCGTCTGAGCGAA…
	SUMO-His-MkPSTK-C-M9767PSTK-C (from Ga0256842_100009767)	MSDSEVNQEAKPEVKPEVKPETHINLKVSDGSSEIFFKIKKTTPLRRLMEAFAKRQGKEMDSLTFLYDGIEIQADQTPEDLDMEDNDIIEAHREQIGGAHHHHHHRLSGSSSVNEVDVRTRQVMGELMRRLSETGAATQELGRKLSELRREIVSSVEDPEKAVREFRRRAEEVIRECLHGDGEENKNKNNESVDEVDRATRRAMGEIMKRAAREGKASQRLGEILSRIRREIASECDDPEEAVRRFRERAEEVLRRWSGGD	ATGTCGGACTCAGAAGTCAATCAAGAAGCTAAGCCAGAGGTCAAGCCAGAAGTCAAGCCTGAGACTCACATCAATTTAAAGGTGTCCGATGGATCTTCAGAGATCTTCTTCAAGATCAAAAAGACCACTCCTTTAAGAAGGCTGATGGAAGCGTTCGCTAAAAGACAGGGTAAGGAAATGGACTCCTTAACGTTCTTGTACGACGGTATTGAAATTCAAGCTGATCAGACCCCTGAAGATTTGGACATGGAGGATAACGATATTATTGAGGCTCACCGCGAACAGATTGGAGGTgcacaccatcatcaccatcaccgtctgtctgggtctAGCAGCGTTAATGAAGTTGATGTTCGTACCCGTCAGGTTATGGGTGAACTGATGCGTCGTCTGAGCGAA…
	SUMO-His-EcSelB-C	MSDSEVNQEAKPEVKPEVKPETHINLKVSDGSSEIFFKIKKTTPLRRLMEAFAKRQGKEMDSLTFLYDGIEIQADQTPEDLDMEDNDIIEAHREQIGGAHHHHHHRLSGSLHLPDHKAGFSEEQQAIWQKAEPLFGDEPWWVRDLAKETGTDEQAMRLTLRQAAQQGIITAIVKDRYYRNDRIVEFANMIRDLDQECGSTCAADFRDRLGVGRKLAIQILEYFDRIGFTRRRGNDHLLRDALLFPEK	ATGTCGGACTCAGAAGTCAATCAAGAAGCTAAGCCAGAGGTCAAGCCAGAAGTCAAGCCTGAGACTCACATCAATTTAAAGGTGTCCGATGGATCTTCAGAGATCTTCTTCAAGATCAAAAAGACCACTCCTTTAAGAAGGCTGATGGAAGCGTTCGCTAAAAGACAGGGTAAGGAAATGGACTCCTTAACGTTCTTGTACGACGGTATTGAAATTCAAGCTGATCAGACCCCTGAAGATTTGGACATGGAGGATAACGATATTATTGAGGCTCACCGCGAACAGATTGGAGGTgcacaccatcatcaccatcaccgtctgtctgggtctCTGCATCTGCCAGATCACAAAGCGGGCTTCAGCGAAGAGCAGCAGGCCATCTGGCAAAAAGCAGAGCCA…
	MS2cp(V29I)-SUMO-His-MkPSTK-C-MS2cp(V29I)	MASNFTQFVLVDNGGTGDVTVAPSNFANGIAEWISSNSRSQAYKVTCSVRQSSAQNRKYTIKVEVPKVATQTVGGVELPVAAWRSYLNMELTIPIFATNSDCELIVKAMQGLLKDGNPIPSAIAANSGIYSSGSNSNSGSMSDSEVNQEAKPEVKPEVKPETHINLKVSDGSSEIFFKIKKTTPLRRLMEAFAKRQGKEMDSLTFLYDGIEIQADQTPEDLDMEDNDIIEAHREQIGGAHHHHHHRLSGSSSVNEVDVRTRQVMGELMRRLSETGAATQELGRKLSELRREIVSSVEDPEKAVREFRRRAEEVIRECLHGDGSGEENKNKNNSSGSNSNSGSASNFTQFVLVDNGGTGDVTVAPSNFANGIAEWISSNSRSQAYKVTCSVRQSSAQNRK…	ATGGCTTCTAACTTTACTCAGTTCGTTCTCGTCGACAATGGCGGAACTGGCGACGTGACTGTCGCCCCAAGCAACTTCGCTAACGGGaTCGCTGAATGGATCAGCTCTAACTCGCGTTCACAGGCTTACAAAGTAACCTGTAGCGTTCGTCAGAGCTCTGCGCAGAATCGCAAATACACCATCAAAGTCGAGGTGCCTAAAGTGGCAACCCAGACTGTTGGTGGTGTAGAGCTTCCTGTAGCCGCATGGCGTTCGTACTTAAATATGGAACTAACCATTCCAATTTTCGCTACGAATTCCGACTGCGAGCTTATTGTTAAGGCAATGCAAGGTCTCCTAAAAGAcGGAAACCCGATTCCCTCAGCAATCGCAGCAAACTCCGGCATCTACtctagtgga…
	MS2cp(V29I)-SUMO-His-MjPSTK-C-MS2cp(V29I)	MASNFTQFVLVDNGGTGDVTVAPSNFANGIAEWISSNSRSQAYKVTCSVRQSSAQNRKYTIKVEVPKVATQTVGGVELPVAAWRSYLNMELTIPIFATNSDCELIVKAMQGLLKDGNPIPSAIAANSGIYSSGSNSNSGSMSDSEVNQEAKPEVKPEVKPETHINLKVSDGSSEIFFKIKKTTPLRRLMEAFAKRQGKEMDSLTFLYDGIEIQADQTPEDLDMEDNDIIEAHREQIGGAHHHHHHRLSGSNISDKIDKETRKIVSEYIKSKKLDKDKIKEVVELRKEFLKKIKKMEEVDADRVLKEFKDLLNSYSGEENKNKNNSSGSNSNSGSASNFTQFVLVDNGGTGDVTVAPSNFANGIAEWISSNSRSQAYKVTCSVRQSSAQNRKYTIKVEVP…	ATGGCTTCTAACTTTACTCAGTTCGTTCTCGTCGACAATGGCGGAACTGGCGACGTGACTGTCGCCCCAAGCAACTTCGCTAACGGGaTCGCTGAATGGATCAGCTCTAACTCGCGTTCACAGGCTTACAAAGTAACCTGTAGCGTTCGTCAGAGCTCTGCGCAGAATCGCAAATACACCATCAAAGTCGAGGTGCCTAAAGTGGCAACCCAGACTGTTGGTGGTGTAGAGCTTCCTGTAGCCGCATGGCGTTCGTACTTAAATATGGAACTAACCATTCCAATTTTCGCTACGAATTCCGACTGCGAGCTTATTGTTAAGGCAATGCAAGGTCTCCTAAAAGAcGGAAACCCGATTCCCTCAGCAATCGCAGCAAACTCCGGCATCTACtctagtgga…
	MS2cp(V29I)-SUMO-His-MS2cp(V29I)	MASNFTQFVLVDNGGTGDVTVAPSNFANGIAEWISSNSRSQAYKVTCSVRQSSAQNRKYTIKVEVPKVATQTVGGVELPVAAWRSYLNMELTIPIFATNSDCELIVKAMQGLLKDGNPIPSAIAANSGIYSSGSNSNSGSMSDSEVNQEAKPEVKPEVKPETHINLKVSDGSSEIFFKIKKTTPLRRLMEAFAKRQGKEMDSLTFLYDGIEIQADQTPEDLDMEDNDIIEAHREQIGGAHHHHHHRLSGSSSVNEVDSGEENKNKNNSSGSNSNSGSASNFTQFVLVDNGGTGDVTVAPSNFANGIAEWISSNSRSQAYKVTCSVRQSSAQNRKYTIKVEVPKVATQTVGGVELPVAAWRSYLNMELTIPIFATNSDCELIVKAMQGLLKDGNPIPSAI…	ATGGCTTCTAACTTTACTCAGTTCGTTCTCGTCGACAATGGCGGAACTGGCGACGTGACTGTCGCCCCAAGCAACTTCGCTAACGGGaTCGCTGAATGGATCAGCTCTAACTCGCGTTCACAGGCTTACAAAGTAACCTGTAGCGTTCGTCAGAGCTCTGCGCAGAATCGCAAATACACCATCAAAGTCGAGGTGCCTAAAGTGGCAACCCAGACTGTTGGTGGTGTAGAGCTTCCTGTAGCCGCATGGCGTTCGTACTTAAATATGGAACTAACCATTCCAATTTTCGCTACGAATTCCGACTGCGAGCTTATTGTTAAGGCAATGCAAGGTCTCCTAAAAGAcGGAAACCCGATTCCCTCAGCAATCGCAGCAAACTCCGGCATCTACtctagtgga…
	PP7cp-SUMO-His-MkPSTK-C-PP7cp	MSKTIVLSVGEATRTLTEIQSTADRQIFEEKVGPLVGRLRLTASLRQNGAKTAYRVNLKLDQADVVDCSTSVCGELPKVRYTQVWSHDVTIVANSTEASRKSLYDLTKSLVATSQVEDLVVNLVPLGRSSGSNSNSGSMSDSEVNQEAKPEVKPEVKPETHINLKVSDGSSEIFFKIKKTTPLRRLMEAFAKRQGKEMDSLTFLYDGIEIQADQTPEDLDMEDNDIIEAHREQIGGAHHHHHHRLSGSSSVNEVDVRTRQVMGELMRRLSETGAATQELGRKLSELRREIVSSVEDPEKAVREFRRRAEEVIRECLHGDGSGEENKNKNNSSGSNSNSGSSKTIVLSVGEATRTLTEIQSTADRQIFEEKVGPLVGRLRLTASLRQNGAKTAYRVNLKL…	ATGAGCAAAACCATTGTTCTGAGCGTTGGTGAAGCAACCCGTACACTGACCGAAATTCAGAGCACCGCAGATCGTCAGATTTTTGAAGAAAAAGTTGGTCCGCTGGTTGGTCGTCTGCGTCTGACCGCAAGCCTGCGTCAGAATGGTGCAAAAACCGCATATCGTGTTAATCTGAAACTGGATCAGGCAGATGTTGTTGATTGTAGCACCAGCGTTTGTGGTGAACTGCCGAAAGTTCGTTATACCCAGGTTTGGAGCCATGATGTTACCATTGTTGCAAATAGCACCGAAGCAAGCCGTAAAAGCCTGTATGATCTGACCAAAAGCCTGGTTGCGACCAGCCAGGTTGAAGATCTGGTTGTGAATCTGGTTCCGCTGGGTCGTtctagtggatcaaac…
	Ma TyrRS	MDVEERMALVTRNAMELVNEDELRELLKTKEQPLAYIGFEPSGLVHMGWALVTAKIRDLCDAGFKVIILWADWHAYINDKLGGNLENIQACARYMEDCFVALGVPKDKVEFRFASEVLDDIDYWEKLIKVGKVTSLSRVKRAMTIMGRKEDEAELDSSKVVYPLMQATDMFHMGIDLAYAGIDQRRAHMLARDAADKLGWKKPLALHTPLLPGLKGGSRMNPEGVKELQTKKVCTTEGEGIEAQTQCMIEMKMSKSDPTSSINIHDDPASVKQKIKKAYCPPEKEKEGENPMLMMARYVIFPRFNNIHIERPEKYGGNVDYATYEELTADYFGGRLSPVDLKEGIVDGINKVLAPVADYFSKFPENYEKMSAIMASVKKLR	ATGGATGTGGAAGAACGTATGGCACTGGTTACCCGTAATGCAATGGAACTGGTTAATGAAGATGAACTGCGTGAACTGCTGAAAACCAAAGAACAGCCGCTGGCATATATTGGTTTTGAACCGAGCGGTCTGGTTCATATGGGTTGGGCATTAGTTACCGCTAAAATTCGTGATCTGTGTGATGCCGGTTTTAAAGTGATTATTCTGTGGGCAGATTGGCACGCCTATATCAATGATAAATTAGGTGGCAACCTGGAAAACATTCAGGCATGTGCACGTTATATGGAAGATTGTTTTGTTGCACTGGGTGTGCCGAAAGATAAAGTGGAATTTCGTTTTGCAAGCGAGGTGCTGGATGATATTGATTATTGGGAGAAACTGATCAAGGTGGGTAAAGTT…
	sfGFP	MSKGEELFTGVVPILVELDGDVNGHKFSVRGEGEGDATNGKLTLKFICTTGKLPVPWPTLVTTLTYGVQCFSRYPDHMKRHDFFKSAMPEGYVQERTISFKDDGTYKTRAEVKFEGDTLVNRIELKGIDFKEDGNILGHKLEYNFNSHNVYITADKQKNGIKANFKIRHNVEDGSVQLADHYQQNTPIGDGPVLLPDNHYLSTQSVLSKDPNEKRDHMVLLEFVTAAGITHGMDELYK	ATGAGCAAAGGAGAAGAACTTTTCACTGGAGTTGTCCCAATTCTTGTTGAATTAGATGGTGATGTTAATGGGCACAAATTTTCTGTCCGTGGAGAGGGTGAAGGTGATGCTACAAACGGAAAACTCACCCTTAAATTTATTTGCACTACTGGAAAACTACCTGTTCCGTGGCCAACACTTGTCACTACTCTGACCTATGGTGTTCAATGCTTTTCCCGTTATCCGGATCACATGAAACGGCATGACTTTTTCAAGAGTGCCATGCCCGAAGGTTATGTACAGGAACGCACTATATCTTTCAAAGATGACGGGACCTACAAGACGCGTGCTGAAGTCAAGTTTGAAGGTGATACCCTTGTTAATCGTATCGAGTTAAAGGGTATTGATTTTAAAGAAGAT…
	Ec HisRS	MAKNIQAIRGMNDYLPGETAIWQRIEGTLKNVLGSYGYSEIRLPIVEQTPLFKRAIGEVTDVVEKEMYTFEDRNGDSLTLRPEGTAGCVRAGIEHGLLYNQEQRLWYIGPMFRHERPQKGRYRQFHQLGCEVFGLQGPDIDAELIMLTARWWRALGISEHVTLELNSIGSLEARANYRDALVAFLEQHKEKLDEDCKRRMYTNPLRVLDSKNPEVQALLNDAPALGDYLDEESREHFAGLCKLLESAGIAYTVNQRLVRGLDYYNRTVFEWVTNSLGSQGTVCAGGRYDGLVEQLGGRATPAVGFAMGLERLVLLVQAVNPEFKADPVVDIYLVASGADTQSAAMALAERLRDELPGVKLMTNHGGGNFKKQFARADKWGARVAVVLGESEVANGTAVV…	ATGGCAAAAAACATTCAAGCCATTCGCGGCATGAACGATTACCTGCCTGGCGAAACGGCCATCTGGCAGCGCATTGAAGGCACACTGAAAAACGTGCTCGGCAGCTACGGTTACAGTGAAATCCGCTTGCCGATTGTAGAGCAGACCCCGCTATTCAAACGTGCGATTGGTGAAGTCACCGACGTGGTTGAAAAAGAGATGTACACCTTTGAGGATCGCAATGGCGACAGCCTGACTCTGCGCCCTGAAGGGACGGCGGGCTGTGTACGCGCCGGCATCGAGCATGGTCTTCTGTACAATCAGGAACAGCGTCTGTGGTATATCGGGCCGATGTTCCGTCACGAGCGTCCGCAGAAAGGGCGTTATCGTCAGTTCCATCAGTTGGGCTGCGAAGTTTTC…
	λN-EcHisRS	MDAQTRRRERRAEKQAQWSSGSNSNSGSMAKNIQAIRGMNDYLPGETAIWQRIEGTLKNVLGSYGYSEIRLPIVEQTPLFKRAIGEVTDVVEKEMYTFEDRNGDSLTLRPEGTAGCVRAGIEHGLLYNQEQRLWYIGPMFRHERPQKGRYRQFHQLGCEVFGLQGPDIDAELIMLTARWWRALGISEHVTLELNSIGSLEARANYRDALVAFLEQHKEKLDEDCKRRMYTNPLRVLDSKNPEVQALLNDAPALGDYLDEESREHFAGLCKLLESAGIAYTVNQRLVRGLDYYNRTVFEWVTNSLGSQGTVCAGGRYDGLVEQLGGRATPAVGFAMGLERLVLLVQAVNPEFKADPVVDIYLVASGADTQSAAMALAERLRDELPGVKLMTNHGGGNFKK…	ATGGATGCACAAACACGCCGCCGCGAACGTCGCGCAGAGAAACAGGCTCAATGGtctagtggatcaaacagcaattctggttctATGGCAAAAAACATTCAAGCCATTCGCGGCATGAACGATTACCTGCCTGGCGAAACGGCCATCTGGCAGCGCATTGAAGGCACACTGAAAAACGTGCTCGGCAGCTACGGTTACAGTGAAATCCGCTTGCCGATTGTAGAGCAGACCCCGCTATTCAAACGTGCGATTGGTGAAGTCACCGACGTGGTTGAAAAAGAGATGTACACCTTTGAGGATCGCAATGGCGACAGCCTGACTCTGCGCCCTGAAGGGACGGCGGGCTGTGTACGCGCCGGCATCGAGCATGGTCTTCTGTACAATCAGGAACAGCGTCTG…
	HkN-EcHisRS	MTSRDRRRIARWEKRIAYSSGSNSNSGSMAKNIQAIRGMNDYLPGETAIWQRIEGTLKNVLGSYGYSEIRLPIVEQTPLFKRAIGEVTDVVEKEMYTFEDRNGDSLTLRPEGTAGCVRAGIEHGLLYNQEQRLWYIGPMFRHERPQKGRYRQFHQLGCEVFGLQGPDIDAELIMLTARWWRALGISEHVTLELNSIGSLEARANYRDALVAFLEQHKEKLDEDCKRRMYTNPLRVLDSKNPEVQALLNDAPALGDYLDEESREHFAGLCKLLESAGIAYTVNQRLVRGLDYYNRTVFEWVTNSLGSQGTVCAGGRYDGLVEQLGGRATPAVGFAMGLERLVLLVQAVNPEFKADPVVDIYLVASGADTQSAAMALAERLRDELPGVKLMTNHGGGNFKK…	ATGACCTCTCGCGATCGTCGTCGCATTGCACGCTGGGAAAAACGCATTGCGTATtctagtggatcaaacagcaattctggttctATGGCAAAAAACATTCAAGCCATTCGCGGCATGAACGATTACCTGCCTGGCGAAACGGCCATCTGGCAGCGCATTGAAGGCACACTGAAAAACGTGCTCGGCAGCTACGGTTACAGTGAAATCCGCTTGCCGATTGTAGAGCAGACCCCGCTATTCAAACGTGCGATTGGTGAAGTCACCGACGTGGTTGAAAAAGAGATGTACACCTTTGAGGATCGCAATGGCGACAGCCTGACTCTGCGCCCTGAAGGGACGGCGGGCTGTGTACGCGCCGGCATCGAGCATGGTCTTCTGTACAATCAGGAACAGCGTCTG…
	SUMO-His-bTat-EcHisRS	MSDSEVNQEAKPEVKPEVKPETHINLKVSDGSSEIFFKIKKTTPLRRLMEAFAKRQGKEMDSLTFLYDGIEIQADQTPEDLDMEDNDIIEAHREQIGGAHHHHHHRLSGSMPGPWVAMIMLPQPKESFGGKPIGWLFWNTCKGPRRDCPHCCCPICSWHCQLCFLQKNLGINYGSGPRRRGTRGKGRRIRRTASGGDQRREADSQRSFTNMDQSSGSNSNSGSMAKNIQAIRGMNDYLPGETAIWQRIEGTLKNVLGSYGYSEIRLPIVEQTPLFKRAIGEVTDVVEKEMYTFEDRNGDSLTLRPEGTAGCVRAGIEHGLLYNQEQRLWYIGPMFRHERPQKGRYRQFHQLGCEVFGLQGPDIDAELIMLTARWWRALGISEHVTLELNSIGSLEARAN…	ATGTCGGACTCAGAAGTCAATCAAGAAGCTAAGCCAGAGGTCAAGCCAGAAGTCAAGCCTGAGACTCACATCAATTTAAAGGTGTCCGATGGATCTTCAGAGATCTTCTTCAAGATCAAAAAGACCACTCCTTTAAGAAGGCTGATGGAAGCGTTCGCTAAAAGACAGGGTAAGGAAATGGACTCCTTAACGTTCTTGTACGACGGTATTGAAATTCAAGCTGATCAGACCCCTGAAGATTTGGACATGGAGGATAACGATATTATTGAGGCTCACCGCGAACAGATTGGAGGTgcacaccatcatcaccatcaccgtctgtctgggtctATGCCTGGTCCGTGGGTTGCAATGATTATGCTGCCGCAGCCGAAAGAAAGCTTTGGTGGTAAACCGATT…
	SUMO-His-TtABDC-EcHisRS	MSDSEVNQEAKPEVKPEVKPETHINLKVSDGSSEIFFKIKKTTPLRRLMEAFAKRQGKEMDSLTFLYDGIEIQADQTPEDLDMEDNDIIEAHREQIGGAHHHHHHRLSGSMEEKGPDLYLIPLTEEAVAEAFYLAEALRPRLRAEYALAPRKPAKGLEEALKRGAAFAGFLGEDELRAGEVTLKRLATGEQVRLSREEVPGYLLQALGSSGSNSNSGSMAKNIQAIRGMNDYLPGETAIWQRIEGTLKNVLGSYGYSEIRLPIVEQTPLFKRAIGEVTDVVEKEMYTFEDRNGDSLTLRPEGTAGCVRAGIEHGLLYNQEQRLWYIGPMFRHERPQKGRYRQFHQLGCEVFGLQGPDIDAELIMLTARWWRALGISEHVTLELNSIGSLEARANYRDAL…	ATGTCGGACTCAGAAGTCAATCAAGAAGCTAAGCCAGAGGTCAAGCCAGAAGTCAAGCCTGAGACTCACATCAATTTAAAGGTGTCCGATGGATCTTCAGAGATCTTCTTCAAGATCAAAAAGACCACTCCTTTAAGAAGGCTGATGGAAGCGTTCGCTAAAAGACAGGGTAAGGAAATGGACTCCTTAACGTTCTTGTACGACGGTATTGAAATTCAAGCTGATCAGACCCCTGAAGATTTGGACATGGAGGATAACGATATTATTGAGGCTCACCGCGAACAGATTGGAGGTgcacaccatcatcaccatcaccgtctgtctgggtctATGGAAGAAAAAGGTCCGGATCTGTATCTGATTCCGCTGACCGAAGAAGCAGTTGCAGAAGCATTTTAT…
	SUMO-His-BuSelBC-EcHisRS	MSDSEVNQEAKPEVKPEVKPETHINLKVSDGSSEIFFKIKKTTPLRRLMEAFAKRQGKEMDSLTFLYDGIEIQADQTPEDLDMEDNDIIEAHREQIGGAHHHHHHRLSGSMLRLAGQEVALLPNEQKLWERLRPWLDEGGVHVPKLSDMLARDRSLHRDQVLRLLRKLAQYGKLYAVSDEYFVQPQHLHALALEAQRLARAEEHRRLNVKDLRESLGLSRHLSLPLVEFFDQVGFTKRDPEGRRVRRDATEMFGGASNASSGSNSNSGSMAKNIQAIRGMNDYLPGETAIWQRIEGTLKNVLGSYGYSEIRLPIVEQTPLFKRAIGEVTDVVEKEMYTFEDRNGDSLTLRPEGTAGCVRAGIEHGLLYNQEQRLWYIGPMFRHERPQKGRYRQFHQLGC…	ATGTCGGACTCAGAAGTCAATCAAGAAGCTAAGCCAGAGGTCAAGCCAGAAGTCAAGCCTGAGACTCACATCAATTTAAAGGTGTCCGATGGATCTTCAGAGATCTTCTTCAAGATCAAAAAGACCACTCCTTTAAGAAGGCTGATGGAAGCGTTCGCTAAAAGACAGGGTAAGGAAATGGACTCCTTAACGTTCTTGTACGACGGTATTGAAATTCAAGCTGATCAGACCCCTGAAGATTTGGACATGGAGGATAACGATATTATTGAGGCTCACCGCGAACAGATTGGAGGTgcacaccatcatcaccatcaccgtctgtctgggtctATGCTGCGTCTGGCAGGTCAAGAAGTTGCACTGCTGCCGAATGAACAGAAACTGTGGGAACGGCTGCGT…
	SUMO-His-xRRM-EcHisRS	MSDSEVNQEAKPEVKPEVKPETHINLKVSDGSSEIFFKIKKTTPLRRLMEAFAKRQGKEMDSLTFLYDGIEIQADQTPEDLDMEDNDIIEAHREQIGGAHHHHHHRLSGSMSNATGPQFVSGVIVKIISTEPLPGRKQVRDTLAAISEVLYVDLLEGDTECHARFKTPEDAQAVINAYTEINKKHCWKLEILSGDHEQRYWQKILVDRQAKLNQPREKKRGTEKSSGSNSNSGSMAKNIQAIRGMNDYLPGETAIWQRIEGTLKNVLGSYGYSEIRLPIVEQTPLFKRAIGEVTDVVEKEMYTFEDRNGDSLTLRPEGTAGCVRAGIEHGLLYNQEQRLWYIGPMFRHERPQKGRYRQFHQLGCEVFGLQGPDIDAELIMLTARWWRALGISEHVTLEL…	ATGTCGGACTCAGAAGTCAATCAAGAAGCTAAGCCAGAGGTCAAGCCAGAAGTCAAGCCTGAGACTCACATCAATTTAAAGGTGTCCGATGGATCTTCAGAGATCTTCTTCAAGATCAAAAAGACCACTCCTTTAAGAAGGCTGATGGAAGCGTTCGCTAAAAGACAGGGTAAGGAAATGGACTCCTTAACGTTCTTGTACGACGGTATTGAAATTCAAGCTGATCAGACCCCTGAAGATTTGGACATGGAGGATAACGATATTATTGAGGCTCACCGCGAACAGATTGGAGGTgcacaccatcatcaccatcaccgtctgtctgggtctATGAGCAATGCAACCGGTCCGCAGTTTGTTAGCGGTGTTATTGTTAAAATCATTAGCACCGAACCGCTG…
	SUMO-His-ApABD-EcHisRS	MSDSEVNQEAKPEVKPEVKPETHINLKVSDGSSEIFFKIKKTTPLRRLMEAFAKRQGKEMDSLTFLYDGIEIQADQTPEDLDMEDNDIIEAHREQIGGAHHHHHHRLSGSGADEETGPVVVTVMDKSRLADYQKITAELRQGLNKDRGPSEPPVPVEMYLGPSGMKAQLKYADRRNAPCAIIVGSDEFEAGKVQVKDLLEGKRKAAAIESHEAYKEERPGQFEIARESLVEEVAALLARQRGEASGEENKNKNNSSGSNSNSGSMAKNIQAIRGMNDYLPGETAIWQRIEGTLKNVLGSYGYSEIRLPIVEQTPLFKRAIGEVTDVVEKEMYTFEDRNGDSLTLRPEGTAGCVRAGIEHGLLYNQEQRLWYIGPMFRHERPQKGRYRQFHQLGCEVFGL…	ATGTCGGACTCAGAAGTCAATCAAGAAGCTAAGCCAGAGGTCAAGCCAGAAGTCAAGCCTGAGACTCACATCAATTTAAAGGTGTCCGATGGATCTTCAGAGATCTTCTTCAAGATCAAAAAGACCACTCCTTTAAGAAGGCTGATGGAAGCGTTCGCTAAAAGACAGGGTAAGGAAATGGACTCCTTAACGTTCTTGTACGACGGTATTGAAATTCAAGCTGATCAGACCCCTGAAGATTTGGACATGGAGGATAACGATATTATTGAGGCTCACCGCGAACAGATTGGAGGTgcacaccatcatcaccatcaccgtctgtctgggtctGGTGCAGATGAAGAAACAGGTCCGGTTGTTGTTACCGTTATGGATAAAAGTCGTCTGGCCGATTATCAG…
	SUMO-His-ApABD(E484A-K493Q)-EcHisRS	MSDSEVNQEAKPEVKPEVKPETHINLKVSDGSSEIFFKIKKTTPLRRLMEAFAKRQGKEMDSLTFLYDGIEIQADQTPEDLDMEDNDIIEAHREQIGGAHHHHHHRLSGSGADEETGPVVVTVMDKSRLADYQKITAELRQGLNKDRGPSEPPVPVEMYLGPSGMKAQLKYADRRNAPCAIIVGSDAFEAGKVQVQDLLEGKRKAAAIESHEAYKEERPGQFEIARESLVEEVAALLARQRGEASGEENKNKNNSSGSNSNSGSMAKNIQAIRGMNDYLPGETAIWQRIEGTLKNVLGSYGYSEIRLPIVEQTPLFKRAIGEVTDVVEKEMYTFEDRNGDSLTLRPEGTAGCVRAGIEHGLLYNQEQRLWYIGPMFRHERPQKGRYRQFHQLGCEVFGL…	ATGTCGGACTCAGAAGTCAATCAAGAAGCTAAGCCAGAGGTCAAGCCAGAAGTCAAGCCTGAGACTCACATCAATTTAAAGGTGTCCGATGGATCTTCAGAGATCTTCTTCAAGATCAAAAAGACCACTCCTTTAAGAAGGCTGATGGAAGCGTTCGCTAAAAGACAGGGTAAGGAAATGGACTCCTTAACGTTCTTGTACGACGGTATTGAAATTCAAGCTGATCAGACCCCTGAAGATTTGGACATGGAGGATAACGATATTATTGAGGCTCACCGCGAACAGATTGGAGGTgcacaccatcatcaccatcaccgtctgtctgggtctGGTGCAGATGAAGAAACAGGTCCGGTTGTTGTTACCGTTATGGATAAAAGTCGTCTGGCCGATTATCAG…
	SUMO-His-CsABD-EcHisRS	MSDSEVNQEAKPEVKPEVKPETHINLKVSDGSSEIFFKIKKTTPLRRLMEAFAKRQGKEMDSLTFLYDGIEIQADQTPEDLDMEDNDIIEAHREQIGGAHHHHHHRLSGSGTAARPGPVVVTVMDRDRLADYQRLTTMLRNGLNAPGQPVVPVEMFQGNPKQFGKQLQYADRRNSPCVVIQGGDEKAAGKVQVKDLVLGKEMSEGISDNAEWREARAGQEVVDEAELVDAVRRILARQASERLKQDSGEENKNKNNSSGSNSNSGSMAKNIQAIRGMNDYLPGETAIWQRIEGTLKNVLGSYGYSEIRLPIVEQTPLFKRAIGEVTDVVEKEMYTFEDRNGDSLTLRPEGTAGCVRAGIEHGLLYNQEQRLWYIGPMFRHERPQKGRYRQFHQLGCEVF…	ATGTCGGACTCAGAAGTCAATCAAGAAGCTAAGCCAGAGGTCAAGCCAGAAGTCAAGCCTGAGACTCACATCAATTTAAAGGTGTCCGATGGATCTTCAGAGATCTTCTTCAAGATCAAAAAGACCACTCCTTTAAGAAGGCTGATGGAAGCGTTCGCTAAAAGACAGGGTAAGGAAATGGACTCCTTAACGTTCTTGTACGACGGTATTGAAATTCAAGCTGATCAGACCCCTGAAGATTTGGACATGGAGGATAACGATATTATTGAGGCTCACCGCGAACAGATTGGAGGTgcacaccatcatcaccatcaccgtctgtctgggtctGGCACCGCAGCACGTCCGGGTCCTGTTGTTGTTACCGTTATGGATCGTGATCGTCTGGCAGATTATCAG…
	SUMO-His-ApABD-CsHisRS	MSDSEVNQEAKPEVKPEVKPETHINLKVSDGSSEIFFKIKKTTPLRRLMEAFAKRQGKEMDSLTFLYDGIEIQADQTPEDLDMEDNDIIEAHREQIGGAHHHHHHRLSGSGADEETGPVVVTVMDKSRLADYQKITAELRQGLNKDRGPSEPPVPVEMYLGPSGMKAQLKYADRRNAPCAIIVGSDEFEAGKVQVKDLLEGKRKAAAIESHEAYKEERPGQFEIARESLVEEVAALLARQRGEASGEENKNKNNSSGSNSNSGSMAPKKPNKVKARVPRGFIDRTPEDLRAQDAMLAVIREVYERYGFEPVETPMFEYTDALGKFLPDSDRPNEGVFSLQDDDEEWLSLRYDLTAPLARYVAENFENLPKPYRSYRAGYVFRNEKPGPGRFRQFMQFDA…	ATGTCGGACTCAGAAGTCAATCAAGAAGCTAAGCCAGAGGTCAAGCCAGAAGTCAAGCCTGAGACTCACATCAATTTAAAGGTGTCCGATGGATCTTCAGAGATCTTCTTCAAGATCAAAAAGACCACTCCTTTAAGAAGGCTGATGGAAGCGTTCGCTAAAAGACAGGGTAAGGAAATGGACTCCTTAACGTTCTTGTACGACGGTATTGAAATTCAAGCTGATCAGACCCCTGAAGATTTGGACATGGAGGATAACGATATTATTGAGGCTCACCGCGAACAGATTGGAGGTgcacaccatcatcaccatcaccgtctgtctgggtctGGTGCAGATGAAGAAACAGGTCCGGTTGTTGTTACCGTTATGGATAAAAGTCGTCTGGCCGATTATCAG…
	SUMO-His-ApABD(E484A-K493Q)-CsHisRS	MSDSEVNQEAKPEVKPEVKPETHINLKVSDGSSEIFFKIKKTTPLRRLMEAFAKRQGKEMDSLTFLYDGIEIQADQTPEDLDMEDNDIIEAHREQIGGAHHHHHHRLSGSGADEETGPVVVTVMDKSRLADYQKITAELRQGLNKDRGPSEPPVPVEMYLGPSGMKAQLKYADRRNAPCAIIVGSDAFEAGKVQVQDLLEGKRKAAAIESHEAYKEERPGQFEIARESLVEEVAALLARQRGEASGEENKNKNNSSGSNSNSGSMAPKKPNKVKARVPRGFIDRTPEDLRAQDAMLAVIREVYERYGFEPVETPMFEYTDALGKFLPDSDRPNEGVFSLQDDDEEWLSLRYDLTAPLARYVAENFENLPKPYRSYRAGYVFRNEKPGPGRFRQFMQFDA…	ATGTCGGACTCAGAAGTCAATCAAGAAGCTAAGCCAGAGGTCAAGCCAGAAGTCAAGCCTGAGACTCACATCAATTTAAAGGTGTCCGATGGATCTTCAGAGATCTTCTTCAAGATCAAAAAGACCACTCCTTTAAGAAGGCTGATGGAAGCGTTCGCTAAAAGACAGGGTAAGGAAATGGACTCCTTAACGTTCTTGTACGACGGTATTGAAATTCAAGCTGATCAGACCCCTGAAGATTTGGACATGGAGGATAACGATATTATTGAGGCTCACCGCGAACAGATTGGAGGTgcacaccatcatcaccatcaccgtctgtctgggtctGGTGCAGATGAAGAAACAGGTCCGGTTGTTGTTACCGTTATGGATAAAAGTCGTCTGGCCGATTATCAG…
	SUMO-His-ApABD-CsCD	MSDSEVNQEAKPEVKPEVKPETHINLKVSDGSSEIFFKIKKTTPLRRLMEAFAKRQGKEMDSLTFLYDGIEIQADQTPEDLDMEDNDIIEAHREQIGGAHHHHHHRLSGSGADEETGPVVVTVMDKSRLADYQKITAELRQGLNKDRGPSEPPVPVEMYLGPSGMKAQLKYADRRNAPCAIIVGSDEFEAGKVQVKDLLEGKRKAAAIESHEAYKEERPGQFEIARESLVEEVAALLARQRGEASGEENKNKNNSSGSNSNSGSMAPKKPNKVKARVPRGFIDRTPEDLRAQDAMLAVIREVYERYGFEPVETPMFEYTDALGKFLPDSDRPNEGVFSLQDDDEEWLSLRYDLTAPLARYVAENFENLPKPYRSYRAGYVFRNEKPGPGRFRQFMQFDA…	ATGTCGGACTCAGAAGTCAATCAAGAAGCTAAGCCAGAGGTCAAGCCAGAAGTCAAGCCTGAGACTCACATCAATTTAAAGGTGTCCGATGGATCTTCAGAGATCTTCTTCAAGATCAAAAAGACCACTCCTTTAAGAAGGCTGATGGAAGCGTTCGCTAAAAGACAGGGTAAGGAAATGGACTCCTTAACGTTCTTGTACGACGGTATTGAAATTCAAGCTGATCAGACCCCTGAAGATTTGGACATGGAGGATAACGATATTATTGAGGCTCACCGCGAACAGATTGGAGGTgcacaccatcatcaccatcaccgtctgtctgggtctGGTGCAGATGAAGAAACAGGTCCGGTTGTTGTTACCGTTATGGATAAAAGTCGTCTGGCCGATTATCAG…
	SUMO-His-CsABD-ApHisRS	MSDSEVNQEAKPEVKPEVKPETHINLKVSDGSSEIFFKIKKTTPLRRLMEAFAKRQGKEMDSLTFLYDGIEIQADQTPEDLDMEDNDIIEAHREQIGGAHHHHHHRLSGSGTAARPGPVVVTVMDRDRLADYQRLTTMLRNGLNAPGQPVVPVEMFQGNPKQFGKQLQYADRRNSPCVVIQGGDEKAAGKVQVKDLVLGKEMSEGISDNAEWREARAGQEVVDEAELVDAVRRILARQASERLKQDSGEENKNKNNSSGSNSNSGSMAPKDKKNRLQARLPRGFADREAGDIRATEKMLAAIKRVYERYGFEPVETPFFEYTEALGKFLPDEDRPNEGVFSLQDEDGEWLSLRYDLTAPLARYVAENYERLAKPYRSYRAGWVFRNEKPGPGRFRQFLQ…	ATGTCGGACTCAGAAGTCAATCAAGAAGCTAAGCCAGAGGTCAAGCCAGAAGTCAAGCCTGAGACTCACATCAATTTAAAGGTGTCCGATGGATCTTCAGAGATCTTCTTCAAGATCAAAAAGACCACTCCTTTAAGAAGGCTGATGGAAGCGTTCGCTAAAAGACAGGGTAAGGAAATGGACTCCTTAACGTTCTTGTACGACGGTATTGAAATTCAAGCTGATCAGACCCCTGAAGATTTGGACATGGAGGATAACGATATTATTGAGGCTCACCGCGAACAGATTGGAGGTgcacaccatcatcaccatcaccgtctgtctgggtctGGCACCGCAGCACGTCCGGGTCCTGTTGTTGTTACCGTTATGGATCGTGATCGTCTGGCAGATTATCAG…
	SUMO-His-CsABD-ApCD	MSDSEVNQEAKPEVKPEVKPETHINLKVSDGSSEIFFKIKKTTPLRRLMEAFAKRQGKEMDSLTFLYDGIEIQADQTPEDLDMEDNDIIEAHREQIGGAHHHHHHRLSGSGTAARPGPVVVTVMDRDRLADYQRLTTMLRNGLNAPGQPVVPVEMFQGNPKQFGKQLQYADRRNSPCVVIQGGDEKAAGKVQVKDLVLGKEMSEGISDNAEWREARAGQEVVDEAELVDAVRRILARQASERLKQDSGEENKNKNNSSGSNSNSGSMAPKDKKNRLQARLPRGFADREAGDIRATEKMLAAIKRVYERYGFEPVETPFFEYTEALGKFLPDEDRPNEGVFSLQDEDGEWLSLRYDLTAPLARYVAENYERLAKPYRSYRAGWVFRNEKPGPGRFRQFLQ…	ATGTCGGACTCAGAAGTCAATCAAGAAGCTAAGCCAGAGGTCAAGCCAGAAGTCAAGCCTGAGACTCACATCAATTTAAAGGTGTCCGATGGATCTTCAGAGATCTTCTTCAAGATCAAAAAGACCACTCCTTTAAGAAGGCTGATGGAAGCGTTCGCTAAAAGACAGGGTAAGGAAATGGACTCCTTAACGTTCTTGTACGACGGTATTGAAATTCAAGCTGATCAGACCCCTGAAGATTTGGACATGGAGGATAACGATATTATTGAGGCTCACCGCGAACAGATTGGAGGTgcacaccatcatcaccatcaccgtctgtctgggtctGGCACCGCAGCACGTCCGGGTCCTGTTGTTGTTACCGTTATGGATCGTGATCGTCTGGCAGATTATCAG…
	Cs HisRS	MAPKKPNKVKARVPRGFIDRTPEDLRAQDAMLAVIREVYERYGFEPVETPMFEYTDALGKFLPDSDRPNEGVFSLQDDDEEWLSLRYDLTAPLARYVAENFENLPKPYRSYRAGYVFRNEKPGPGRFRQFMQFDADIVGAPNVSADAEMAMMMADTMEALGIKRGDYVIRVNNRKVLDGVLDAIGLEGQAERRLTVLRAIDKLDKFGVAGVRELLGKGRLDESGDFTKGAELDEGQILRLEKLYSVQEEGRKDFFLFMNAAELLQDDSVFGEPTETMGDVAGANVWANPRFLDIILEEFLDSPAVVAGLEELKNISAFVRAAGYGTKRIRIDTSVVRGLEYYTGPVFEAELLFDVTNDKGEVVRFGSVGGGGRYDGLVARFMSQPVPATGFSIGVSRLQ…	ATGGCACCGAAAAAACCGAATAAAGTTAAAGCACGTGTTCCGCGTGGTTTTATTGATCGTACACCGGAAGATCTGCGTGCACAGGATGCAATGCTGGCAGTTATTCGTGAAGTTTATGAACGCTATGGTTTTGAACCGGTTGAAACCCCGATGTTTGAATATACCGATGCACTGGGTAAATTTCTGCCGGATAGCGATCGTCCGAATGAAGGTGTTTTTAGCCTGCAGGATGATGATGAAGAATGGCTGAGCCTGCGTTATGATCTGACCGCACCGCTGGCACGTTATGTGGCAGAAAATTTTGAAAATCTGCCGAAACCGTATCGTAGCTATCGTGCAGGTTATGTGTTTCGCAATGAAAAACCTGGTCCGGGTCGTTTTCGTCAGTTTATGCAGTTT…

## Sheet: vector
	vector description	nucleotide sequence	how to clone a gene
	pBAD-RSF5 reconstructed	ATGCATAATGTGCCTGTCAAATGGACGAAGCAGGGATTCTGCAAACCCTATGCTACTCCGTCAAGCCGTCAATTGTCTGATTCGTTACCAATTATGACAACTTGACGGCTACATCATTCACTTTTTCTTCACAACCGGCACGGAACTCGCTCGGGCTGGCCCCGGTGCATTTTTTAAATACCCGCGAGAAATAGAGTTGATCGTCAAAACCAACATTGCGACCGACGGTGGCGATAGGCATCCGGGTGGTGCTCAAAAGCAGCTTCGCCTGGCTGATACGTTGGTCCTCGCGCCAGCTTAAGACGCTAATCCCTAACTGCTGGCGGAAAAGATGTGACAGACGCGACGGCGACAAGCAAACATGCTGTGCGACGCTGGCGATATCAAAATTGCTGTCTG…	GAATTC-(tRNA)-G-GATCT
	pGEX-6P-1 trimmed	ACGTTATCGACTGCACGGTGCACCAATGCTTCTGGCGTCAGGCAGCCATCGGAAGCTGTGGTATGGCTGTGCAGGTCGTAAATCACTGCATAATTCGTGTCGCTCAAGGCGCACTCCCGTTCTGGATAATGTTTTTTGCGCCGACATCATAACGGTTCTGGCAAATATTCTGAAATGAGCTGTTGACAATTAATCATCGGCTCGTATAATGTGTGGAATTGTGAGCGGATAACAATTTCACACaggaaacagtattcATGTAAtgaggccgggaaTGACTGACTGACGATCTGCCTCGCGCGTTTCGGTGATGACGGTGAAAACCTCTGACACATGCAGCTCCCGGAGACGGTCACAGCTTGTCTGTAAGCGGATGCCGGGAGCAGACAAGCCCGTCAG…	aggaaacagtattc-(ORF)-tgaggccgggaa
	pACYC184	GAATTCCGGATGAGCATTCATCAGGCGGGCAAGAATGTGAATAAAGGCCGGATAAAACTTGTGCTTATTTTTCTTTACGGTCTTTAAAAAGGCCGTAATATCCAGCTGAACGGTCTGGTTATAGGTACATTGAGCAACTGACTGAAATGCCTCAAAATGTTCTTTACGATGCCATTGGGATATATCAACGGTGGTATATCCAGTGATTTTTTTCTCCATTTTAGCTTCCTTAGCTCCTGAAAATCTCGATAACTCAAAAAATACGCCCGGTAGTGATCTTATTTCATTATGGTGAAAGTTGGAACCTCTTACGTGCCGATCAACGTCTCATTTTCGCCAAAAGTTGGCCCAGGGCTTCCCGGTATCAACAGGGACACCAGGATTTATTTATTCTGCGAA…	The cat ORF -> Ma TyrRS ORF
	pACYC184-cat(His193TAG)	GAATTCCGGATGAGCATTCATCAGGCGGGCAAGAATGTGAATAAAGGCCGGATAAAACTTGTGCTTATTTTTCTTTACGGTCTTTAAAAAGGCCGTAATATCCAGCTGAACGGTCTGGTTATAGGTACATTGAGCAACTGACTGAAATGCCTCAAAATGTTCTTTACGATGCCATTGGGATATATCAACGGTGGTATATCCAGTGATTTTTTTCTCCATTTTAGCTTCCTTAGCTCCTGAAAATCTCGATAACTCAAAAAATACGCCCGGTAGTGATCTTATTTCATTATGGTGAAAGTTGGAACCTCTTACGTGCCGATCAACGTCTCATTTTCGCCAAAAGTTGGCCCAGGGCTTCCCGGTATCAACAGGGACACCAGGATTTATTTATTCTGCGAA…	tet-atggaaagagaataaac-(ORF)-cggattcac
	pACYC184-cat(Ser146TAG)-bla(Ala182TAG)	GAATTCCGGATGAGCATTCATCAGGCGGGCAAGAATGTGAATAAAGGCCGGATAAAACTTGTGCTTATTTTTCTTTACGGTCTTTAAAAAGGCCGTAATATCCAGCTGAACGGTCTGGTTATAGGTACATTGAGCAACTGACTGAAATGCCTCAAAATGTTCTTTACGATGCCATTGGGATATATCAACGGTGGTATATCCAGTGATTTTTTTCTCCATTTTAGCTTCCTTAGCTCCTGAAAATCTCGATAACTCAAAAAATACGCCCGGTAGTGATCTTATTTCATTATGGTGAAAGTTGGAACCTCTTACGTGCCGATCAACGTCTCATTTTCGCCAAAAGTTGGCCCAGGGCTTCCCGGTATCAACAGGGACACCAGGATTTATTTATTCTGCGAA…
